# Supplementary material for: Pathogenic POGZ mutation causes impaired cortical development and reversible autism-like phenotypes
Source: PubMed Central journal article supplement (PMC7044294; doi:10.1038/s41467-020-14697-z), 2020-02-26
Supplement: 41467_2020_14697_MOESM1_ESM.pdf [file 41467_2020_14697_MOESM1_ESM.pdf]

Supplementary Information:

**Pathogenic POGZ Mutation Causes Impaired Cortical  
Development and Reversible Autism-Like Phenotypes**

Matsumura K. et al.

Conserved residues in human and mouse  
 C2H2 Zn Finger     HPZ     CENP-DB domain     Rve superfamily  
↓ ASD case    ↓ ID case    ↓ ASD/ID case    ↓ Unclassified NDDs case    ↓ Control

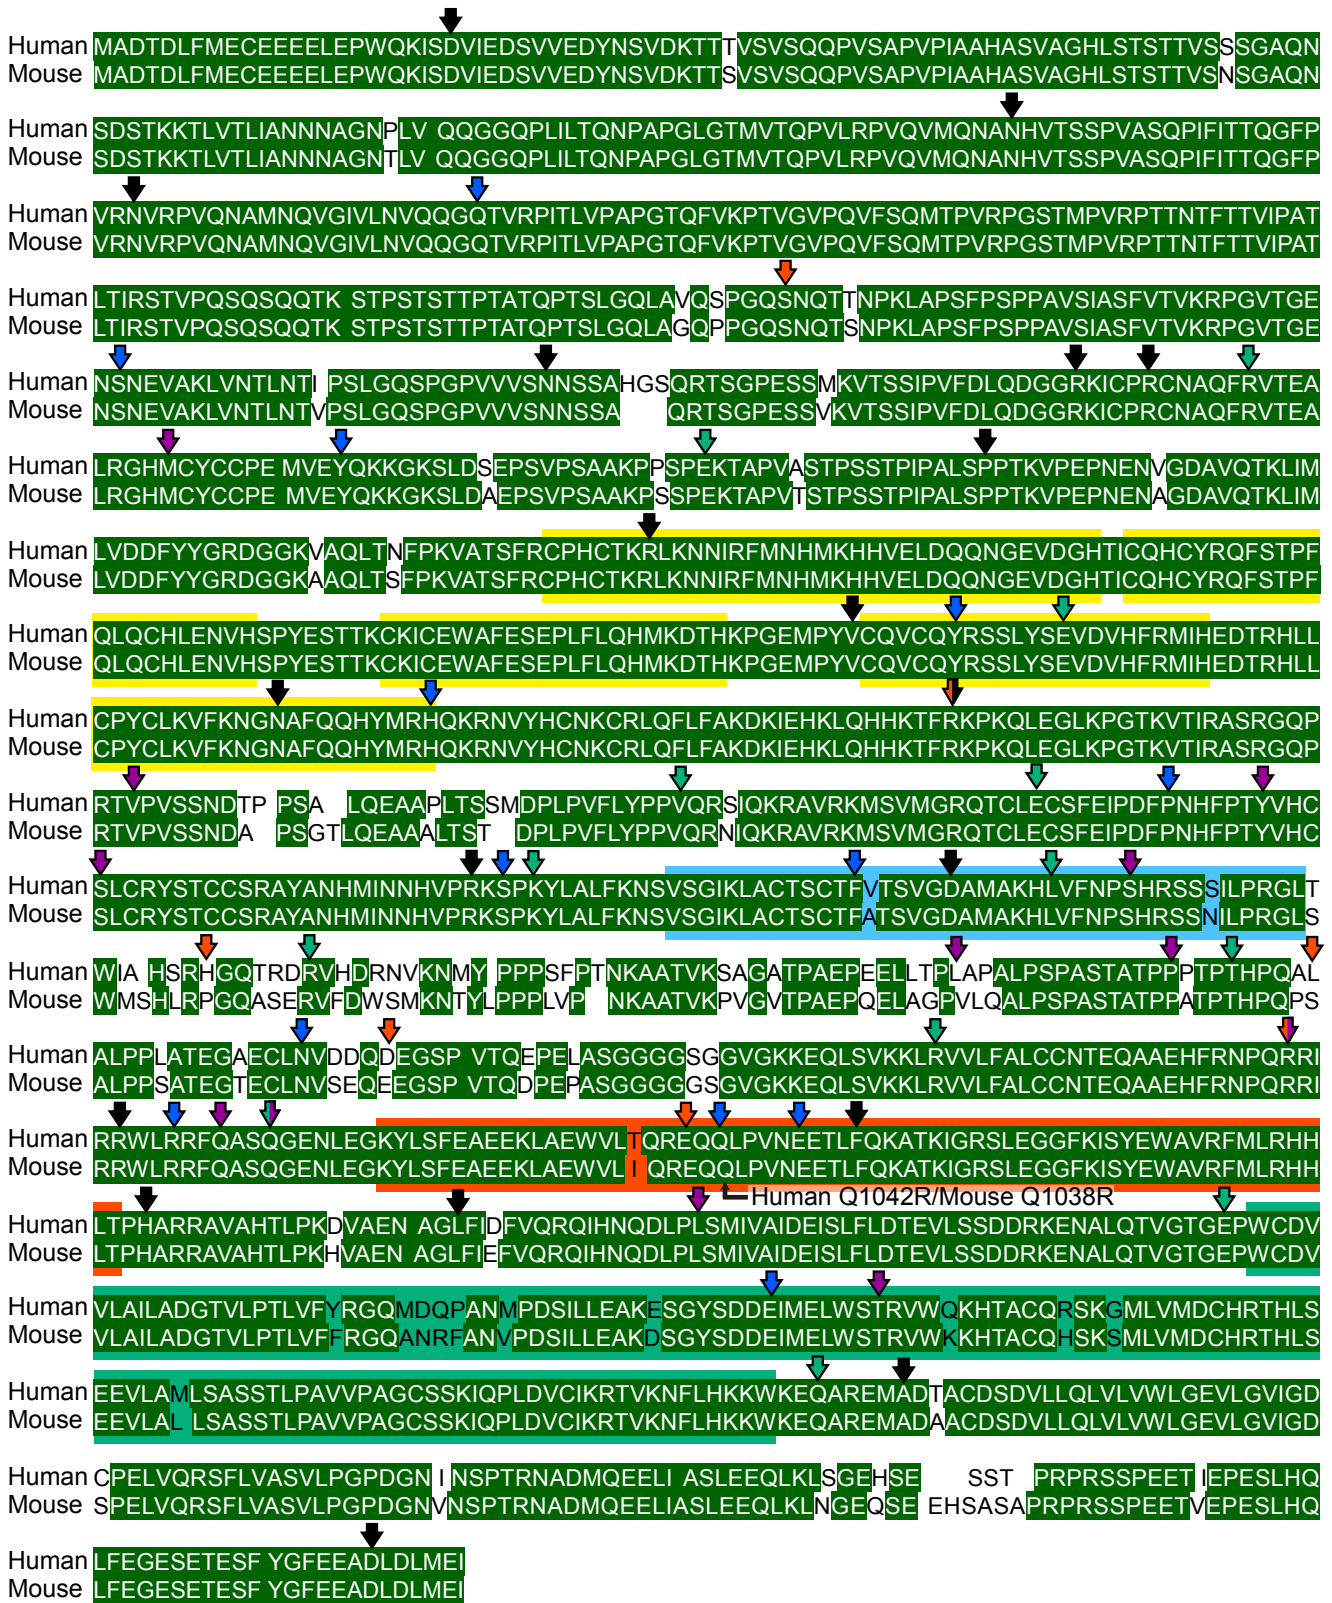

Supplementary Fig. 1 | **Amino acids sequence alignment of human and mouse POGZ.** Conserved residues between human POGZ (NP\_055915.2) and mouse POGZ (NP\_766271.2) are highlighted in green. Yellow boxes indicate C2H2 Zn Finger domains. The blue box indicates HPZ domain. The red box indicates CENP-DB domain. The green box indicates Rve-superfamily domain. Blue arrows indicate residues mutated in sporadic ASD cases. Green arrows indicate residues mutated in sporadic ID cases. Red arrows indicate residues mutated in sporadic ASD/ID cases. Purple arrows indicate residues mutated in sporadic unclassified NDDs cases. Black arrows indicate unaffected controls. Note that the mouse Q1038R mutation is corresponding to the human Q1042R mutation (indicated by an arrow in the CENP-DB domain).

ASD-related *de novo* mutated mPOGZ

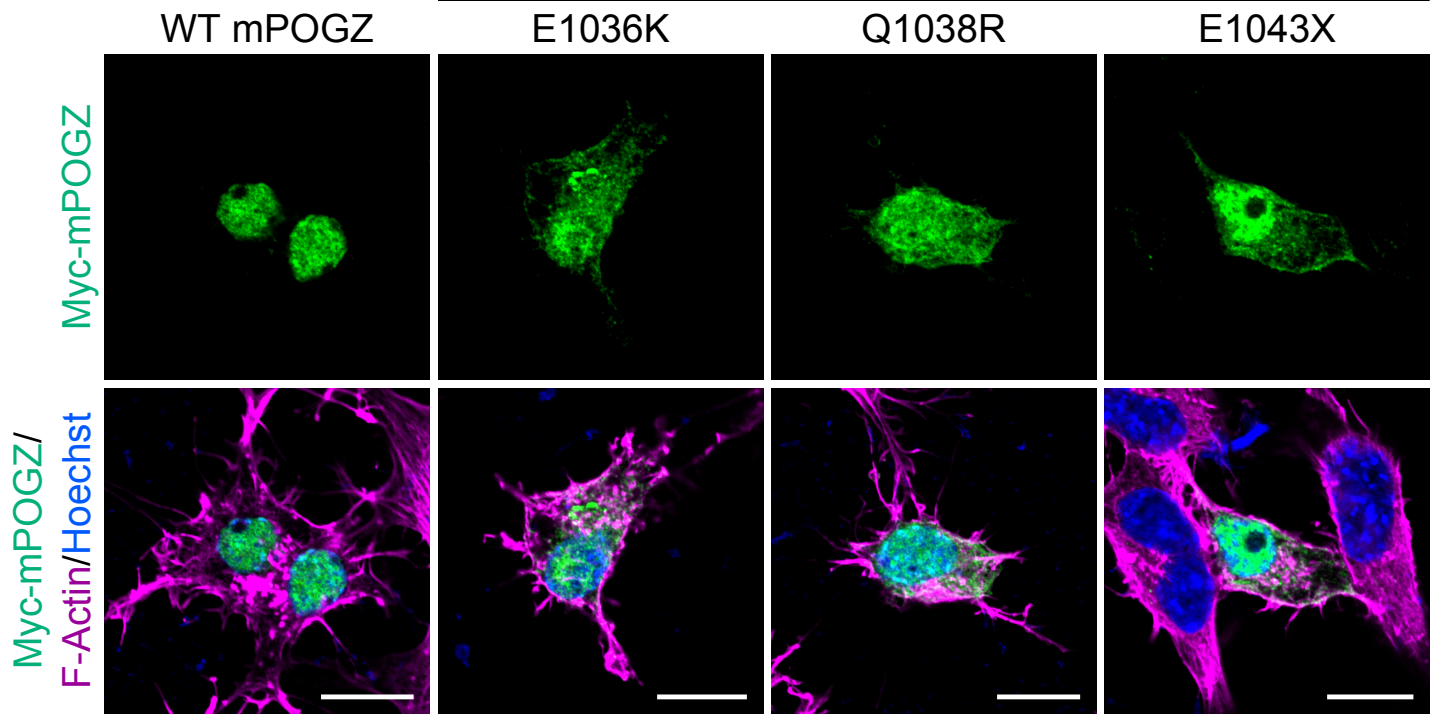

Supplementary Fig. 2 | **ASD-related *de novo* mutations in POGZ disrupt the cellular localization of the POGZ protein.** Myc-immunostaining and F-actin staining by Alexa Fluor 546-phalloidin showing nuclear localization of Myc-tagged overexpressed mouse (m) WT POGZ and disrupted cellular localization of Myc-tagged ASD-related *de novo* mutated mPOGZ variants in Neuro2a cells. WT, wild-type. Scale bars, 10  $\mu$ m.

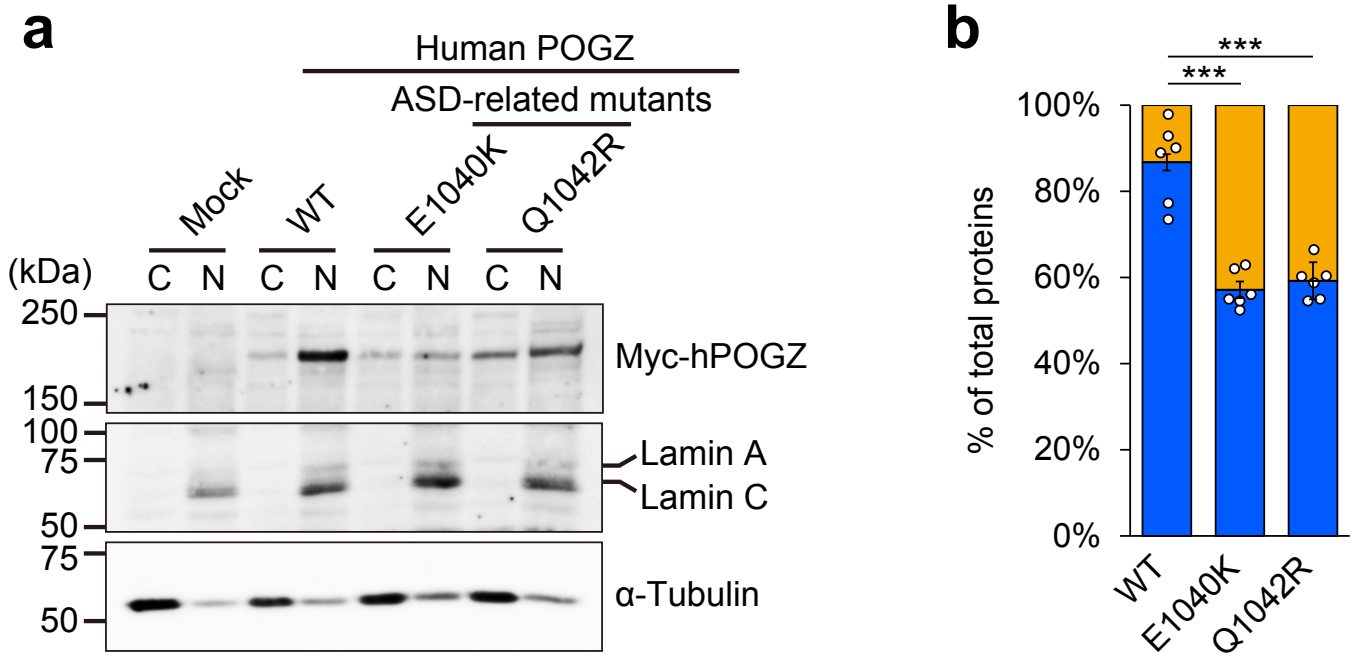

Supplementary Fig. 3 | **ASD-related *de novo* missense mutations in human POGZ impair the nuclear localization of the human POGZ protein.** **a**, ASD-related missense mutations disrupted the nuclear localization of Myc-tagged overexpressed human (h) POGZ in SHSY-5Y cells. C, cytosolic fraction; N, nuclear fraction; WT, wild-type. **b**, Quantification of Myc-hPOGZ in cytosolic and nuclear fractions (each  $n = 6$ ). Note that the amino acid numbers are based on the human protein (NP\_055915.2). One-way ANOVA with Bonferroni-Dunn *post hoc* tests;  $F_{2, 15} = 38.98$ . \*\*\* $P < 0.001$ . Data are presented as the mean  $\pm$  s.e.m. The source data underlying Fig **a** are provided as a Source Data file.



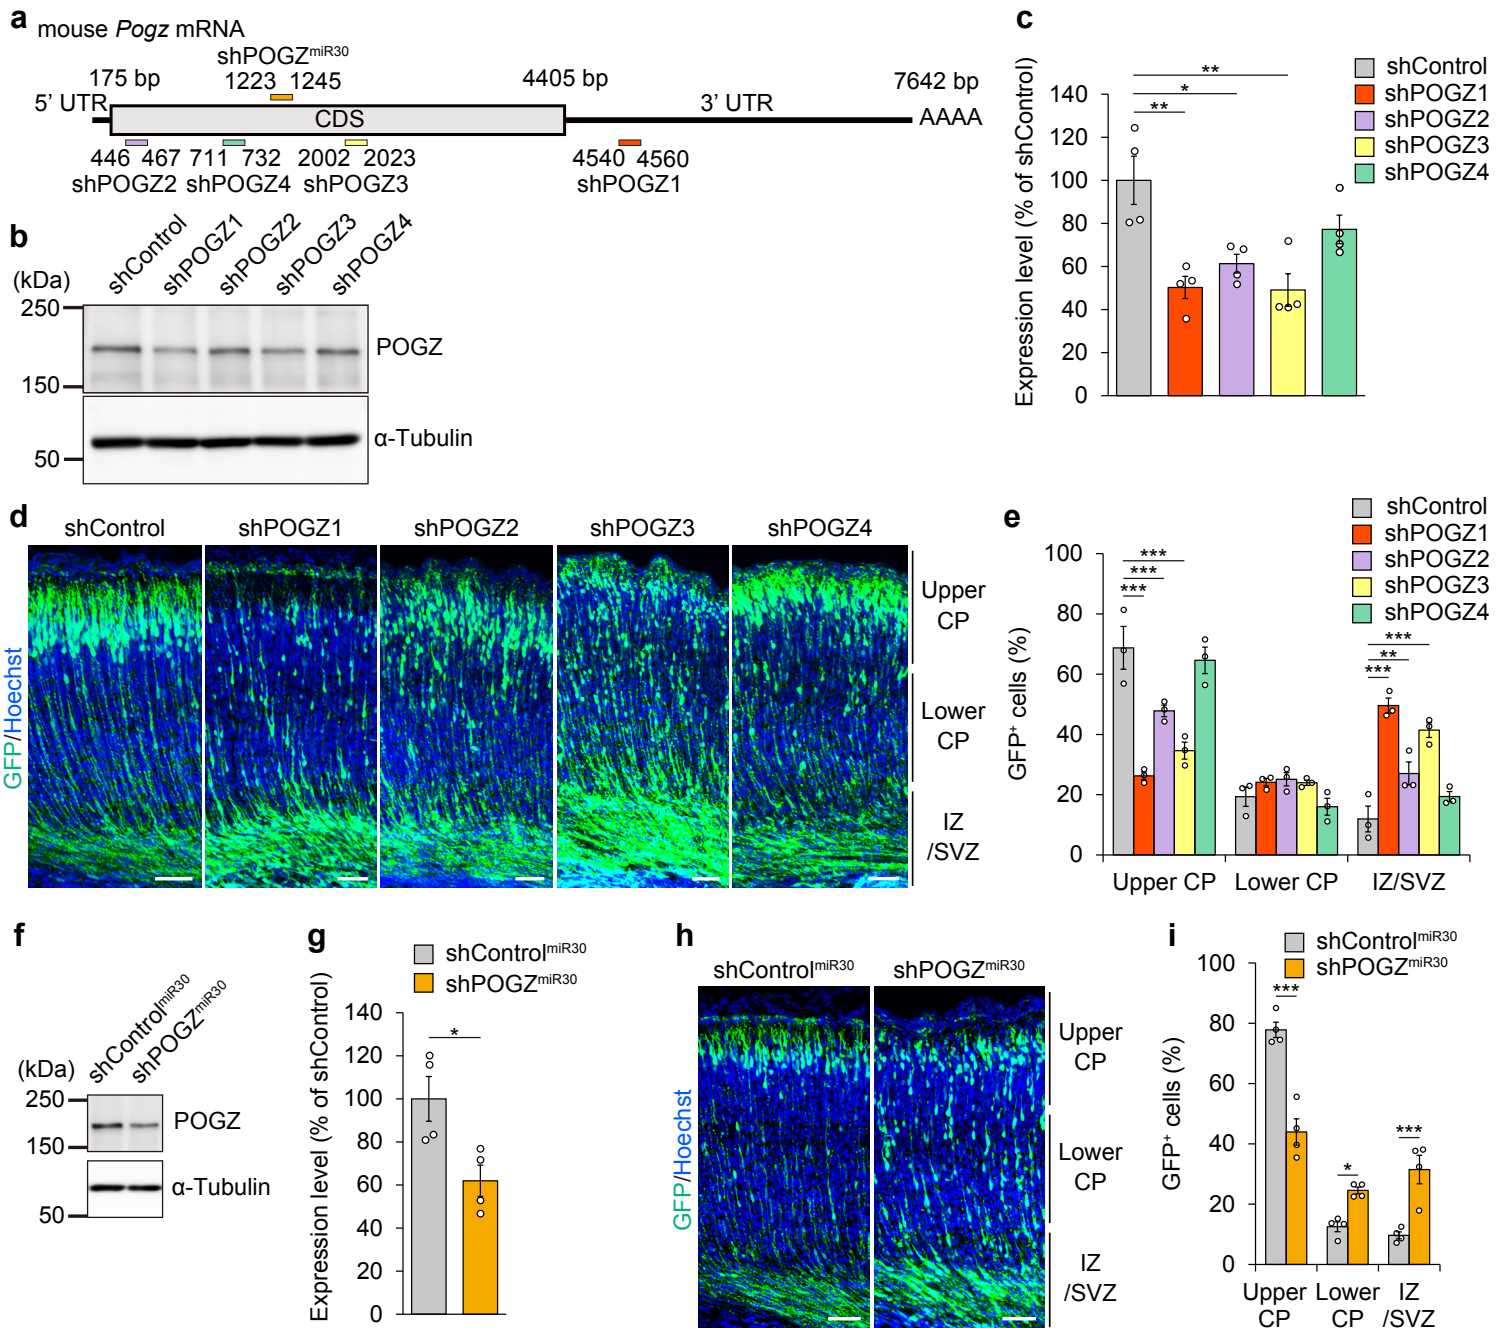

Supplementary Fig. 4 | **ShRNA- and shRNA<sup>miR30</sup>- mediated knockdown of *Pogz*.** **a**, Schematic diagram of shRNAs and a miR30-based shRNA against mouse *Pogz* (NM\_172683.3). **b**, Representative western blotting for endogenous POGZ in Neuro2a cells transfected with the plasmids expressing the indicated shRNA constructs against *Pogz*. **c**, Quantification of the expression levels of endogenous POGZ in Neuro2a cells transfected with the plasmids expressing indicated shRNA constructs against *Pogz* (each n = 4). **d**, Migration defects caused by shRNA-mediated knockdown of *Pogz* in E18.5 mouse cortices electroporated at E14.5. Scale bars, 50  $\mu$ m. **e**, Quantification of GFP<sup>+</sup> cells in each layer (CP, cortical plate; IZ, intermediate zone; SVZ, subventricular zone; each n = 3). **f**, Representative western blotting for endogenous POGZ in Neuro2a cells transfected with the plasmid expressing the miR30-based shRNA construct against *Pogz*. **g**, Quantification of expression levels of endogenous POGZ in Neuro2a cells transfected with the plasmid expressing the miR30-based shRNA construct against *Pogz* (each n = 4). **h**, Migration defects caused by miR30-based shRNA-mediated knockdown of *Pogz* in E18.5 mouse cortices electroporated at E14.5. Scale bars, 50  $\mu$ m. **i**, Quantification of GFP<sup>+</sup> cells in each layer (CP, cortical plate; IZ, intermediate zone; SVZ, subventricular zone; each n = 4). **c**, One-way ANOVA with Bonferroni-Dunn *post hoc* tests; **c**,  $F_{4, 15} = 8.371$ . **e**, **i**, Two-way repeated-measures ANOVA with Bonferroni-Dunn tests; **e**,  $F_{8, 30} = 28.52$ ; **i**,  $F_{2, 18} = 49.72$ . **g**, Student's *t*-test. \* $P < 0.05$ , \*\* $P < 0.01$ , \*\*\* $P < 0.001$ . Data are presented as the mean  $\pm$  s.e.m. The source data underlying Figs **b** and **f** are provided as a Source Data file.

**a**E14.5 : *in utero* electroporation → E17.5 analysis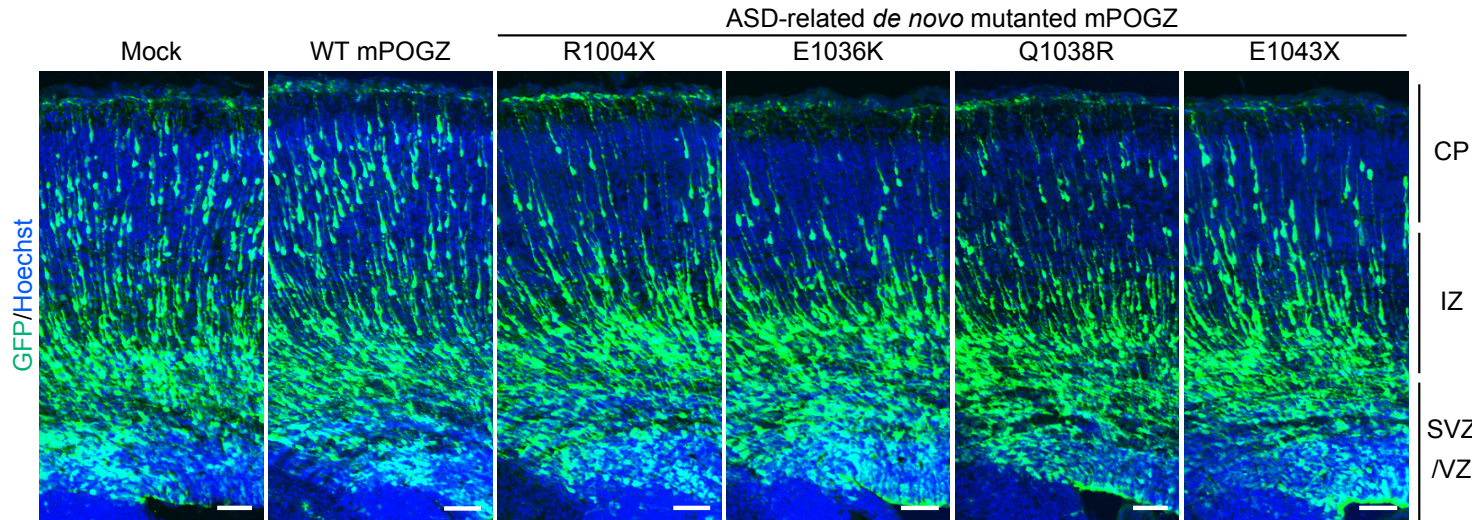**b**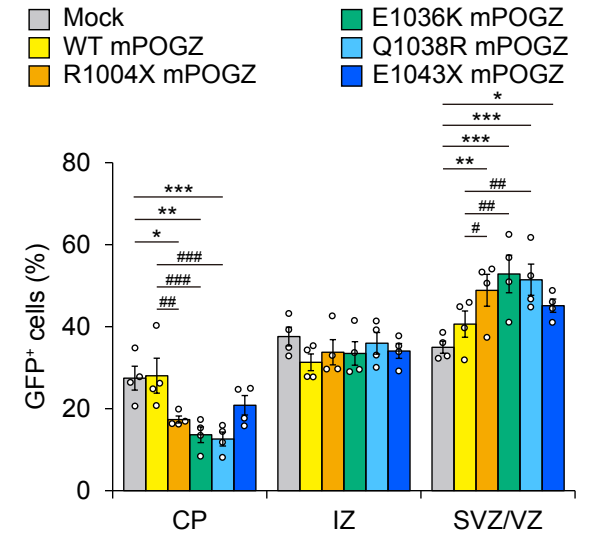

Supplementary Fig. 5 | **ASD-related POGZ mutations exhibit dominant negative effects on the function of endogenous POGZ.** **a**, Forced expression of the ASD-related mPOGZ mutants impaired the neuronal migration in E17.5 mouse cortices electroporated at E14.5. WT, wild-type; CP, cortical plate; IZ, intermediate zone; SVZ, subventricular zone; VZ, ventricular zone; E, embryonic day. Scale bars, 50  $\mu$ m. **b**, Quantification of GFP<sup>+</sup> cells in each layer (each n = 4). Two-way repeated-measures ANOVA with Bonferroni-Dunn *post hoc* tests; **b**,  $F_{10, 54} = 6.099$ . \* $P < 0.05$ , \*\* $P < 0.01$ , \*\*\* $P < 0.001$ , # $P < 0.05$ , ### $P < 0.01$ , #### $P < 0.001$  (vs WT mPOGZ). Data are presented as the mean  $\pm$  s.e.m.



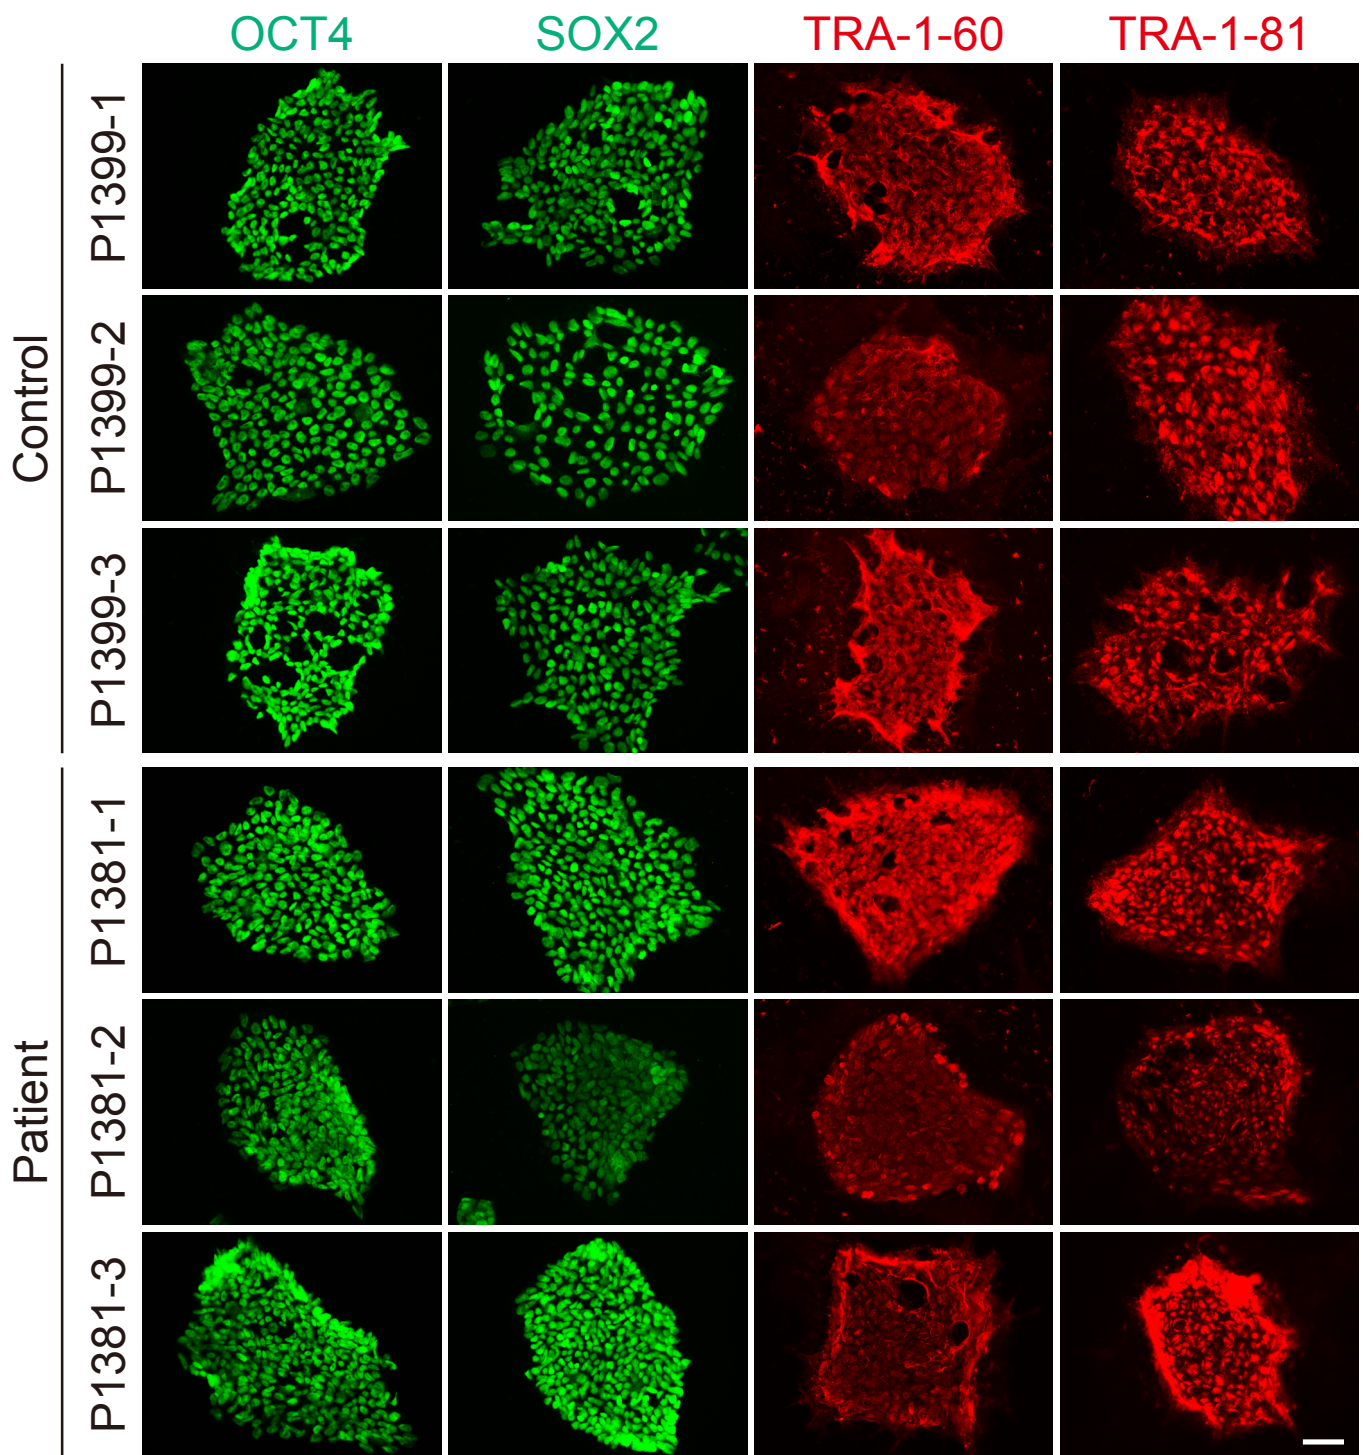

Supplementary Fig. 6 | **Generation of iPSC lines from a patient with ASD who carries the Q1042R mutation in POGZ and from an unaffected healthy control.** Representative images of iPSC lines. iPSC lines were stained for pluripotency markers (OCT-4A, SOX2, TRA-1-60 and TRA-1-81). Scale bar, 50  $\mu$ m.

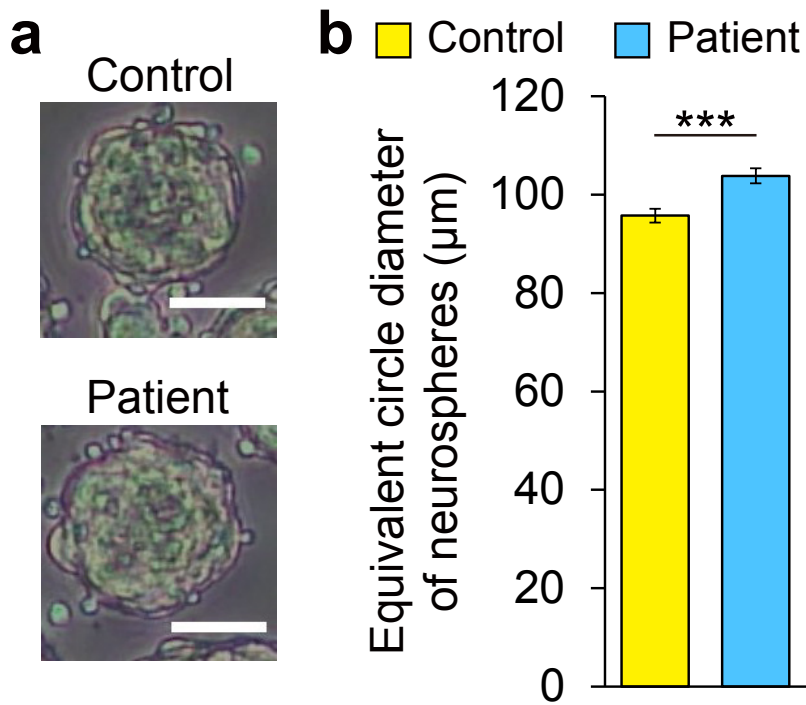

Supplementary Fig. 7 | **Increased size of patient-derived neurospheres.** **a**, Representative images of neurospheres derived from the patient and unaffected healthy control. Scale bars, 50  $\mu\text{m}$ . **b**, Quantification of the size of neurospheres derived from the patient and unaffected healthy control (control,  $n = 681$ ; patient,  $n = 537$ ). **b**, Student's  $t$ -test. \*\*\* $P < 0.001$ . Data are presented as the mean  $\pm$  s.e.m. The source data underlying Fig **b** are provided as a Source Data file.

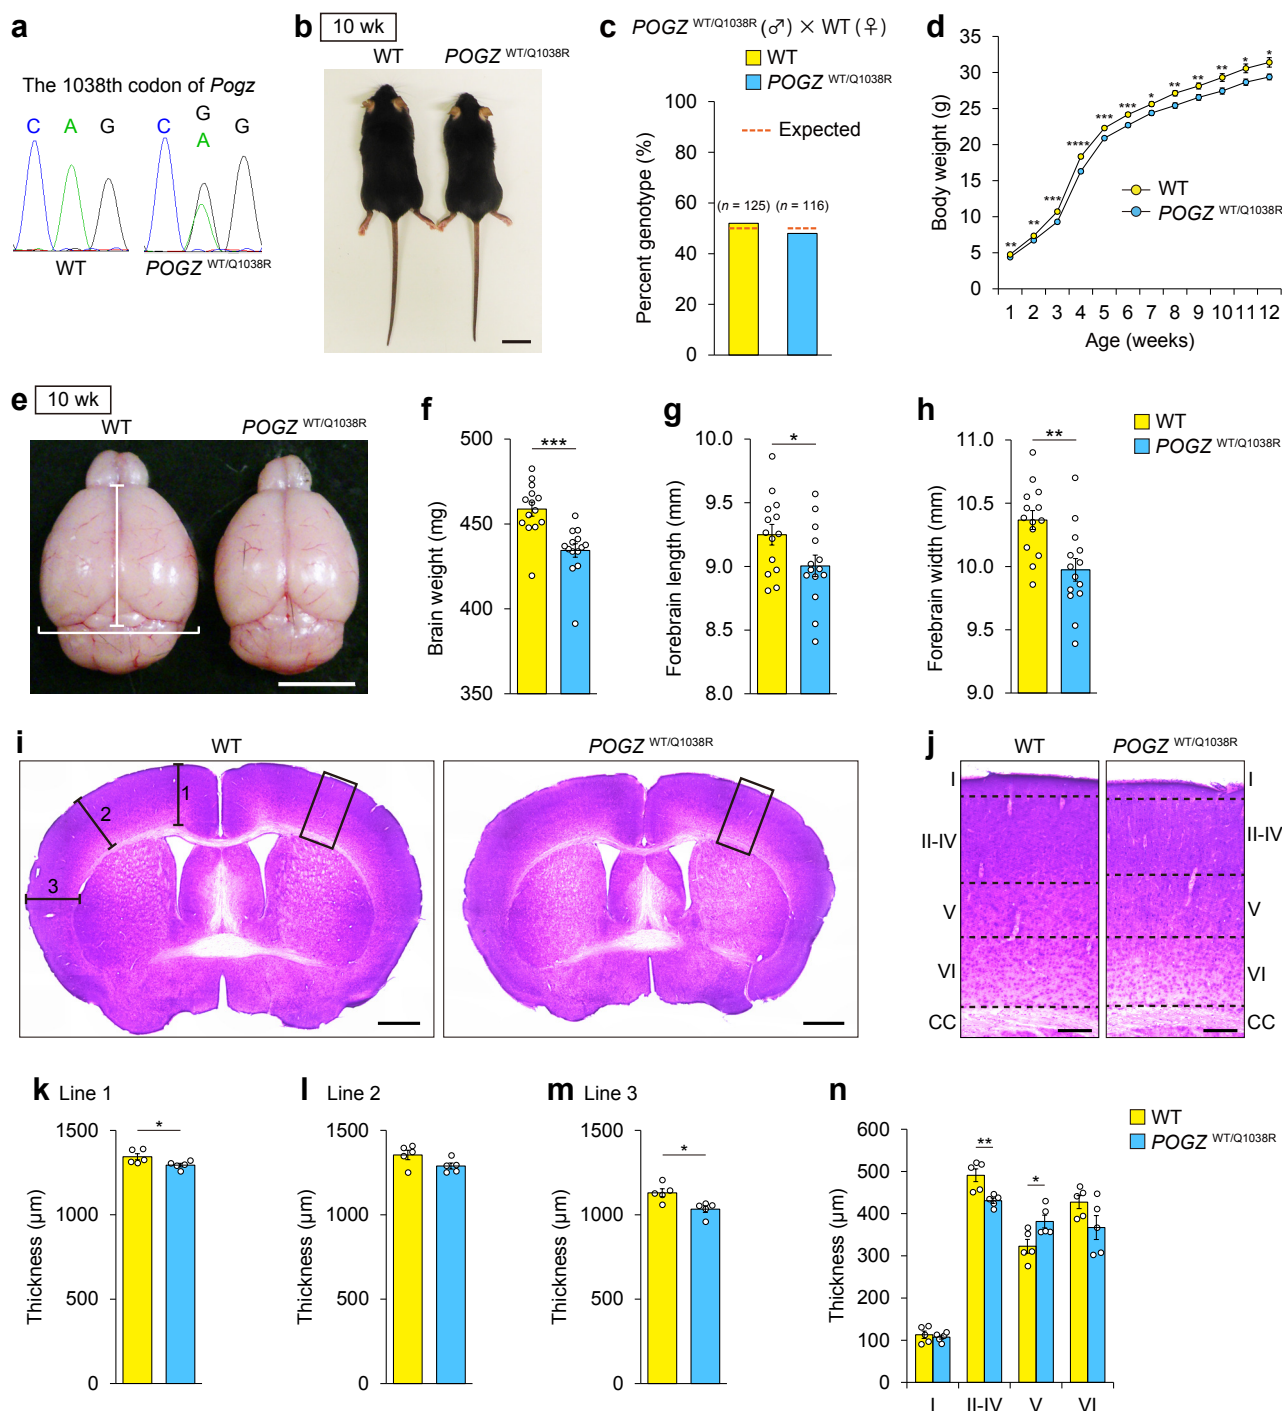

Supplementary Fig. 8 | **Generation of  $POGZ^{WT/Q1038R}$  mice.** **a**, The A is substituted with G in codon 1038 of the mouse *Pogz* gene. **b**, Decreased body size in  $POGZ^{WT/Q1038R}$  mice at 10 wk. wk, week-old. Scale bar, 2 cm. **c**, Genotyping of 1 wk offspring from crosses between male  $POGZ^{WT/Q1038R}$  mice and female WT mice yielded the expected Mendelian ratio of WT and  $POGZ^{WT/Q1038R}$  mice ( $n = 30$  pairs). **d**, Quantification of body weight in WT and  $POGZ^{WT/Q1038R}$  mice (WT,  $n = 20$ ;  $POGZ^{WT/Q1038R}$ ,  $n = 21$ ). **e**, Decreased brain size in  $POGZ^{WT/Q1038R}$  mice at 10 wk. Scale bar, 5 mm. Forebrain length and width are indicated by white lines. **f**, Quantification of brain weight (each  $n = 14$ ). **g**, Quantification of forebrain length (each  $n = 14$ ). **h**, Quantification of forebrain width (each  $n = 14$ ). **i**, Representative coronal sections of WT and  $POGZ^{WT/Q1038R}$  brains at 10 wk visualized with hematoxylin and eosin (HE) staining at Bregma 0 mm. We measured the length of each line as thickness of the cortex. Scale bars, 1 mm. **j**, Magnifications of the areas outlined with black boxes in **i**. Scale bars, 200  $\mu\text{m}$ . **k-m**, Quantification of thickness of the cortex at line 1 (**k**), line 2 (**l**) and line 3 (**m**) shown in **i** (each  $n = 5$ ). **n**, Quantification of thickness of each cortical layer shown in **j** (each  $n = 5$ ). WT, wild-type; wk, week-old. **d**, **n**, Two-way repeated-measures ANOVA with Bonferroni-Dunn *post hoc* tests; **d**,  $F_{11, 468} = 1.089$ ; **n**,  $F_{3, 32} = 6.717$ . **f**, **g**, **h**, **k**, **l**, **m**, Student's *t*-test. \* $P < 0.05$ , \*\* $P < 0.01$ , \*\*\* $P < 0.001$ . Data are presented as the mean  $\pm$  s.e.m. The source data underlying Fig **d** are provided as a Source Data file.



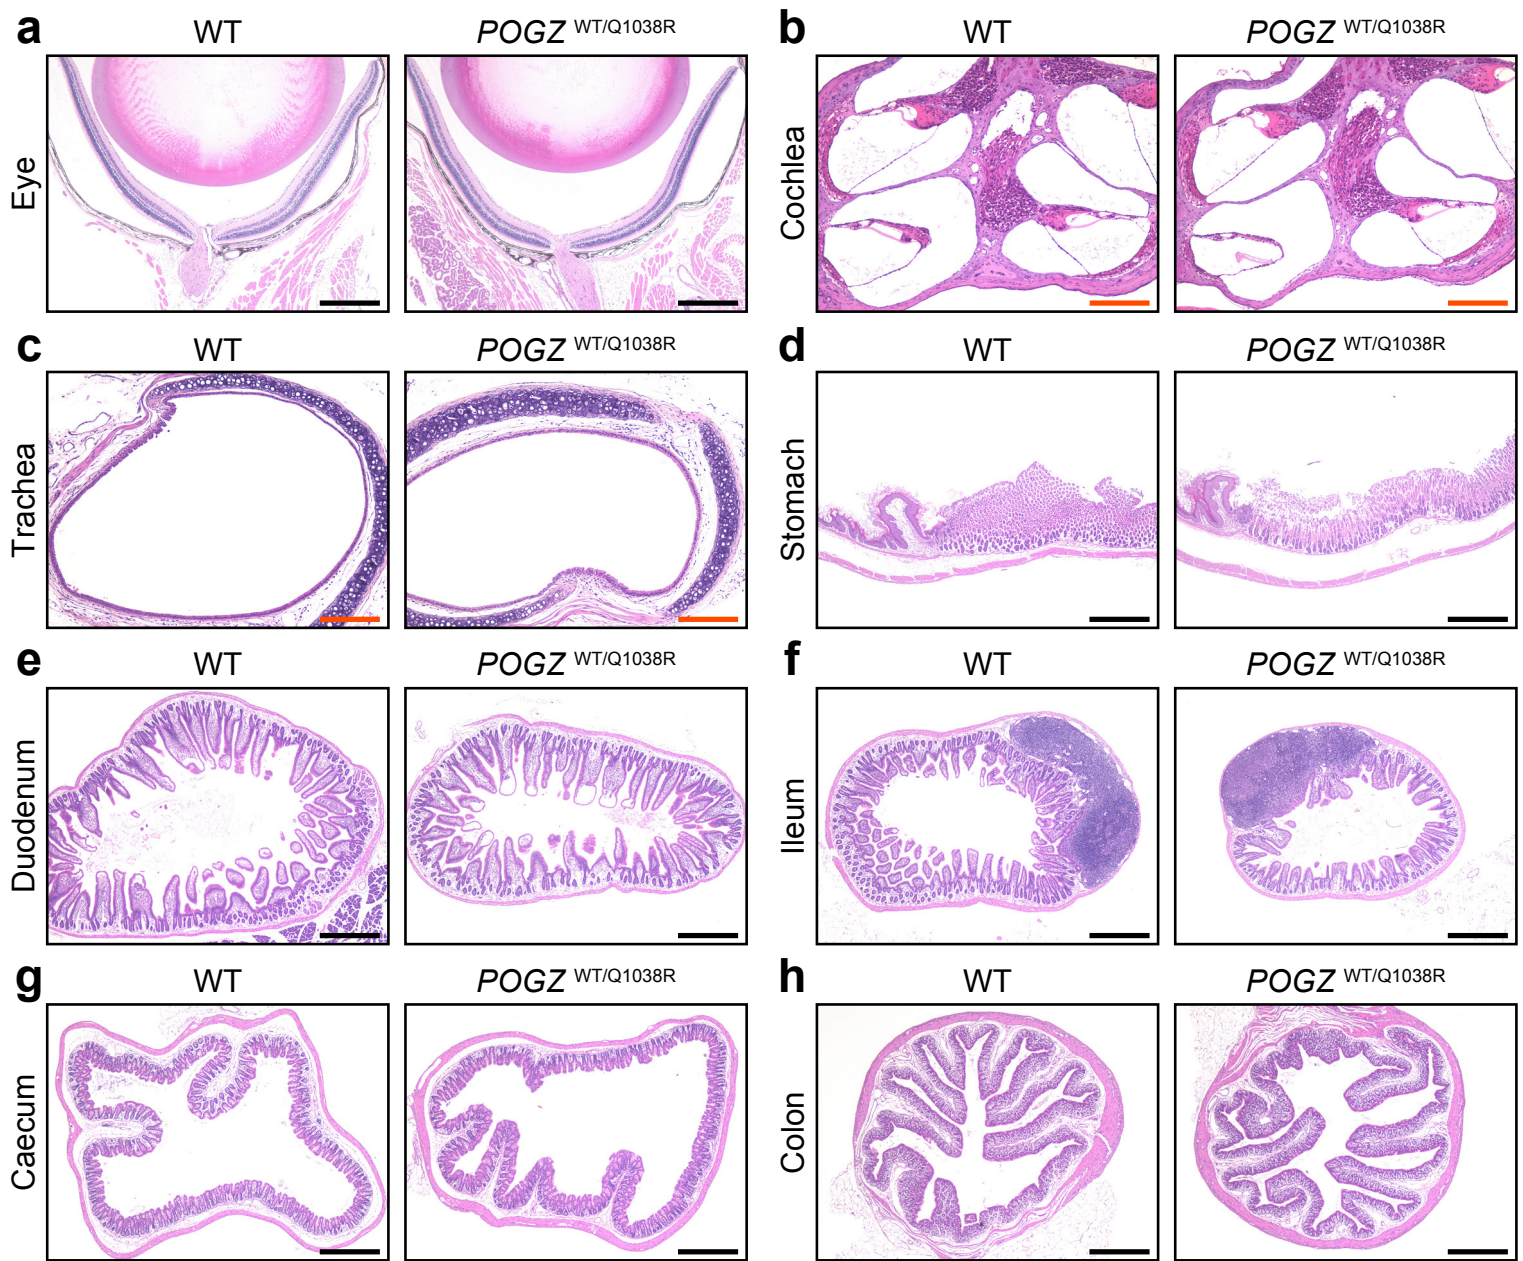

Supplementary Fig. 9 | Hematoxylin and eosin (HE) staining of peripheral organs of  $POGZ^{WT/Q1038R}$  mice. a-j,  $POGZ^{WT/Q1038R}$  mice did not exhibit any significant changes in peripheral organs, including eye (a), cochlea (b), trachea (c), stomach (d), duodenum (e), ileum (f), caecum (g) and colon (h), compared to WT mice. WT, wild-type. Black scale bars, 500  $\mu\text{m}$ ; red scale bars, 200  $\mu\text{m}$ .

**a**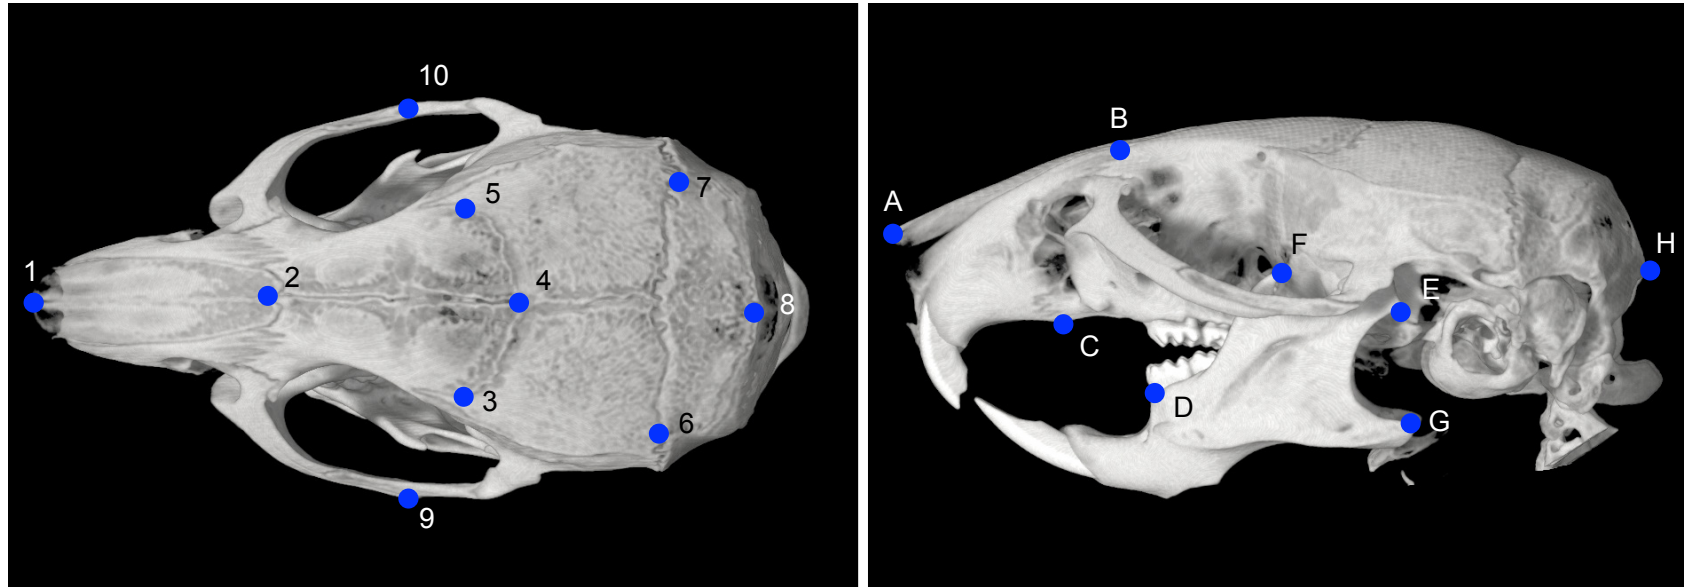**b**

| landmark | WT           | <i>POGZ</i> <sup>WT/Q1038R</sup> | <i>P</i> value |
|----------|--------------|----------------------------------|----------------|
| 1 and 2  | 7.42 ± 0.07  | 7.12 ± 0.16                      | NS             |
| 1 and 4  | 15.42 ± 0.05 | 14.69 ± 0.30                     | NS             |
| 1 and 8  | 22.57 ± 0.08 | 21.45 ± 0.28                     | NS             |
| 3 and 5  | 6.11 ± 0.13  | 5.97 ± 0.09                      | NS             |
| 6 and 7  | 8.39 ± 0.13  | 7.86 ± 0.09                      | NS             |
| 9 and 10 | 12.28 ± 0.12 | 11.77 ± 0.21                     | NS             |
| A and H  | 23.41 ± 0.26 | 23.27 ± 0.32                     | NS             |
| B and C  | 5.84 ± 0.13  | 5.73 ± 0.08                      | NS             |
| D and E  | 8.25 ± 0.08  | 8.10 ± 0.12                      | NS             |
| F and G  | 6.47 ± 0.12  | 6.56 ± 0.05                      | NS             |

**c**

|                    | WT   | <i>POGZ</i> <sup>WT/Q1038R</sup> | <i>P</i> value |
|--------------------|------|----------------------------------|----------------|
| 1 and 2 / 1 and 8  | 0.33 | 0.33                             | NS             |
| 1 and 4 / 1 and 8  | 0.68 | 0.68                             | NS             |
| 3 and 5 / 1 and 8  | 0.27 | 0.28                             | NS             |
| 6 and 7 / 1 and 8  | 0.37 | 0.37                             | NS             |
| 9 and 10 / 1 and 8 | 0.54 | 0.55                             | NS             |
| B and C / A and H  | 0.25 | 0.25                             | NS             |
| F and G / D and E  | 0.78 | 0.81                             | NS             |

Supplementary Fig. 10 | **CT analysis of the skull of *POGZ*<sup>WT/Q1038R</sup> mice.** **a**, Schematics of landmarks in the mouse skull. The top view of the CT image (*left*); Temporal side view of the CT image (*right*). Numerals and letters indicate the anatomical landmarks in **b**. The schematics are created by us (Shibuya and Tamura). **b**, Linear distances (mm) between landmarks in WT and *POGZ*<sup>WT/Q1038R</sup> mice. Anatomical landmarks for the skull were referred to the previous report (Maga, A.M. *et al.*, *Front. Physiol.* **6**, 92 (2015)) (WT, n = 6; *POGZ*<sup>WT/Q1038R</sup>, n = 5). **c**, Linear distance ratios between landmarks of WT and *POGZ*<sup>WT/Q1038R</sup> mice (WT, n = 6; *POGZ*<sup>WT/Q1038R</sup>, n = 5). WT, wild-type; NS, not significant. **b**, **c**, Welch's *t*-test. Data are presented as the mean ± s.e.m.

**a** $POGZ^{WT/Q1038R} (\sigma^7) \times POGZ^{WT/Q1038R} (\text{♀})$ 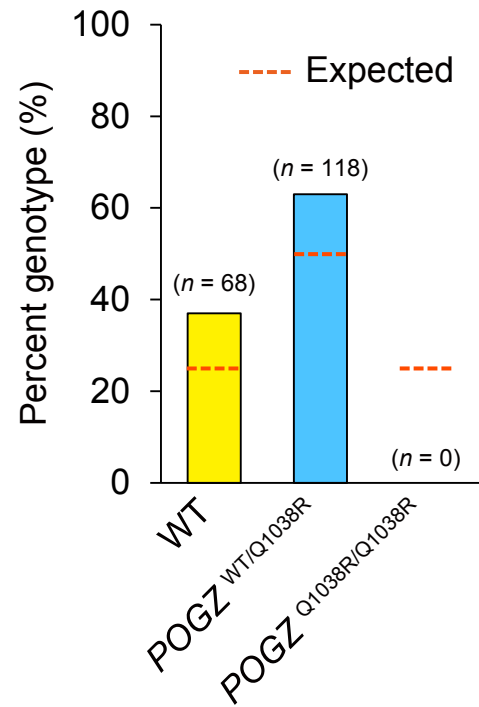**b**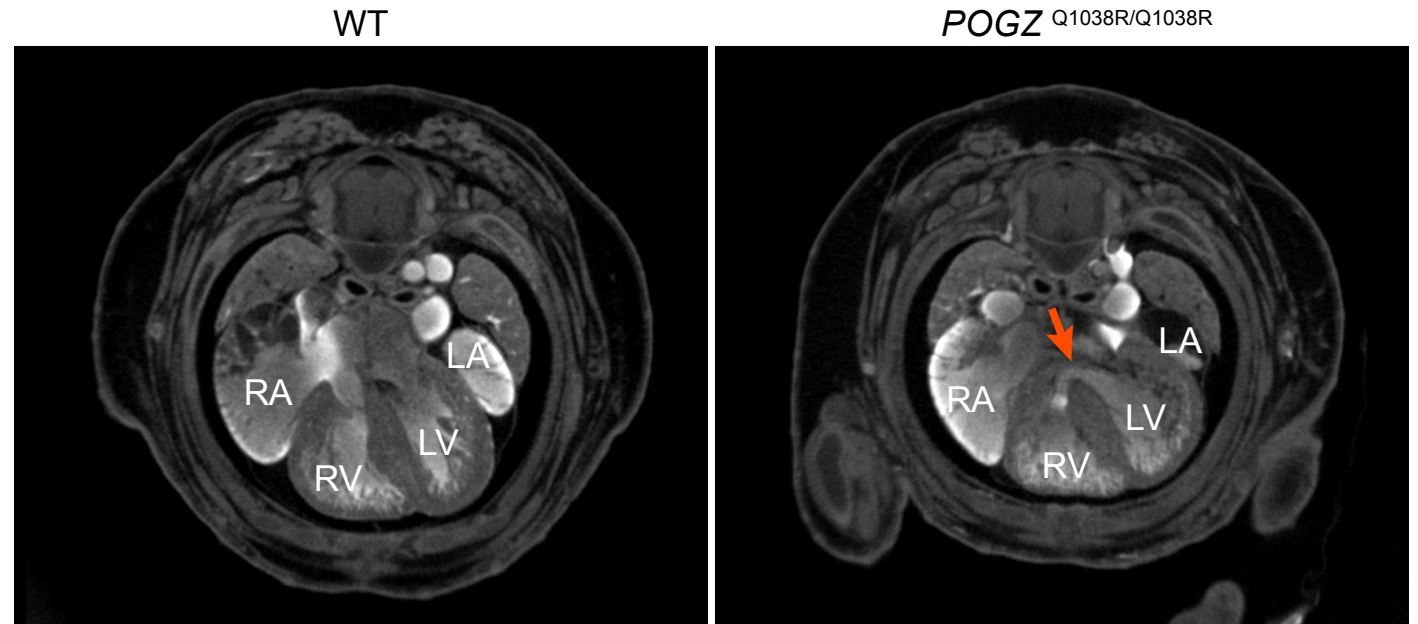

Supplementary Fig. 11 | **Embryonic lethality of homozygous  $POGZ^{Q1038R/Q1038R}$  mice.** **a**, Genotyping of 1-week-old offspring from intercrosses of  $POGZ^{WT/Q1038R}$  mice yielded no homozygous  $POGZ^{Q1038R/Q1038R}$  mice ( $n = 25$  pairs). **b**, Representative images of the CT analysis of WT and  $POGZ^{Q1038R/Q1038R}$  mice at E15.5 (each  $n = 4$ ). The red arrow indicates ventricular septal defects. WT, wild-type; LA, Left atrium; LV, left ventricle; RA, right atrium; RV, right ventricle.



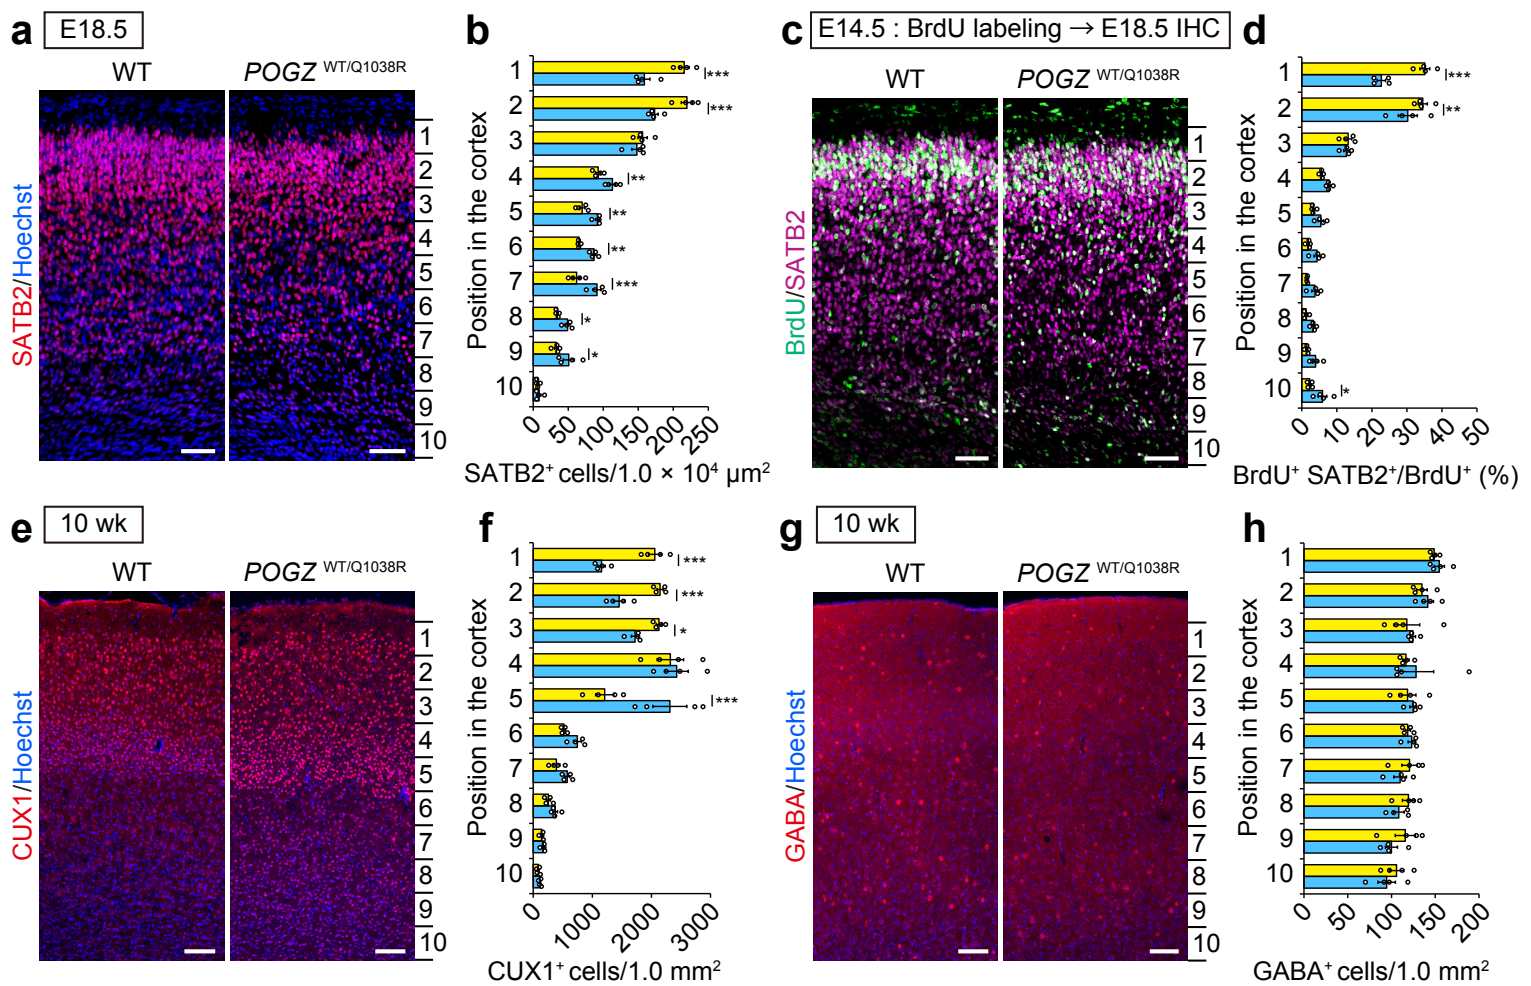

Supplementary Fig. 12 | **Impaired cortical neuronal development in *POGZ*<sup>WT/Q1038R</sup> mice.** **a**, SATB2 immunostaining showing the abnormal distribution of SATB2<sup>+</sup> cortical excitatory neurons in *POGZ*<sup>WT/Q1038R</sup> mice at E18.5. Scale bars, 50 μm. WT, wild-type; E, embryonic day. **b**, Distribution of SATB2<sup>+</sup> neurons in ten equal bins (CP 1 to IZ/SVZ 10) within the developing cortex (each n = 4). The cortex was divided into 10 layers to form the bins. **c**, BrdU and SATB2 immunostaining in *POGZ*<sup>WT/Q1038R</sup> mice at E18.5. Scale bars, 50 μm. IHC, immunohistochemistry. **d**, Distribution of SATB2<sup>+</sup> BrdU<sup>+</sup> neurons in ten equal bins (CP 1 to IZ/SVZ 10) within the developing cortex (each n = 4). The cortex was divided into 10 layers to form the bins. Scale bars, 50 μm. **e**, CUX1 immunostaining showing the abnormal distribution of CUX1<sup>+</sup> cortical excitatory neurons in the adult *POGZ*<sup>WT/Q1038R</sup> mice (10 weeks old). Scale bars, 100 μm. wk, week-old. **f**, Distribution of CUX1<sup>+</sup> neurons in ten equal bins (CP 1 to IZ/SVZ 10) of the adult cortex (each n = 4). The cortex was divided into 10 layers to form the bins. **g**, GABA immunostaining showing the normal distribution of GABA<sup>+</sup> inhibitory neurons in the adult *POGZ*<sup>WT/Q1038R</sup> mice (10 weeks old). Scale bars, 100 μm. **h**, Distribution of GABA<sup>+</sup> neurons in ten equal bins (CP 1 to IZ/SVZ 10) of the adult cortex (each n = 4). The cortex was divided into 10 layers to form the bins. CP, cortical plate; IZ, intermediate zone; SVZ, subventricular zone. **b**, **d**, **f**, **h**, Two-way repeated-measures ANOVA with Bonferroni-Dunn *post hoc* tests; **b**,  $F_{9,60} = 17.03$ ; **d**,  $F_{9,60} = 12.17$ ; **f**,  $F_{9,60} = 12.62$ ; **g**,  $F_{9,60} = 0.706$ . \* $P < 0.05$ , \*\* $P < 0.01$ , \*\*\* $P < 0.001$ . Data are presented as the mean ± s.e.m.

**a**Enriched transcriptional networks in NSCs derived from the Patient and *POGZ*<sup>WT/Q1038R</sup> mice

| ID         | Name                                                     | Patient  |             | <i>POGZ</i> <sup>WT/Q1038R</sup> mice |             |
|------------|----------------------------------------------------------|----------|-------------|---------------------------------------|-------------|
|            |                                                          | p value  | FDR q value | p value                               | FDR q value |
| GO:0007399 | nervous system development                               | 8.82E-11 | 2.48E-08    | 1.32E-05                              | 2.19E-04    |
| GO:0051239 | regulation of multicellular organismal process           | 4.93E-09 | 6.93E-07    | 9.06E-10                              | 5.09E-08    |
| GO:0048856 | anatomical structure development                         | 1.19E-08 | 9.43E-07    | 2.13E-07                              | 6.66E-06    |
| GO:0022008 | neurogenesis                                             | 1.34E-08 | 9.43E-07    | 1.20E-03                              | 8.88E-03    |
| GO:0055085 | transmembrane transport                                  | 1.99E-08 | 1.12E-06    | 2.48E-06                              | 4.98E-05    |
| GO:0048699 | generation of neurons                                    | 6.25E-08 | 2.93E-06    | 1.69E-03                              | 1.06E-02    |
| GO:0007275 | multicellular organism development                       | 8.15E-08 | 2.97E-06    | 4.04E-08                              | 1.42E-06    |
| GO:0009653 | anatomical structure morphogenesis                       | 8.47E-08 | 2.97E-06    | 1.05E-03                              | 7.93E-03    |
| GO:0048731 | system development                                       | 1.05E-07 | 3.28E-06    | 2.74E-08                              | 1.10E-06    |
| GO:0034220 | ion transmembrane transport                              | 1.98E-07 | 5.57E-06    | 3.49E-07                              | 9.80E-06    |
| GO:0032502 | developmental process                                    | 2.69E-07 | 6.88E-06    | 1.48E-06                              | 3.20E-05    |
| GO:0007267 | cell-cell signaling                                      | 4.64E-07 | 1.08E-05    | 2.40E-15                              | 6.74E-13    |
| GO:0030182 | neuron differentiation                                   | 5.02E-07 | 1.08E-05    | 1.48E-03                              | 1.03E-02    |
| GO:0051240 | positive regulation of multicellular organismal process  | 6.12E-07 | 1.23E-05    | 1.96E-08                              | 9.17E-07    |
| GO:0006811 | ion transport                                            | 1.00E-06 | 1.88E-05    | 6.49E-10                              | 4.56E-08    |
| GO:0048869 | cellular developmental process                           | 3.04E-06 | 5.34E-05    | 3.01E-04                              | 2.73E-03    |
| GO:2000026 | regulation of multicellular organismal development       | 5.10E-06 | 8.21E-05    | 2.19E-05                              | 3.07E-04    |
| GO:0007166 | cell surface receptor signaling pathway                  | 5.26E-06 | 8.21E-05    | 6.70E-04                              | 5.71E-03    |
| GO:0007155 | cell adhesion                                            | 5.93E-06 | 8.76E-05    | 1.08E-11                              | 1.01E-09    |
| GO:0050793 | regulation of developmental process                      | 6.75E-06 | 9.48E-05    | 2.10E-04                              | 2.03E-03    |
| GO:0006812 | cation transport                                         | 7.08E-06 | 9.48E-05    | 6.37E-07                              | 1.63E-05    |
| GO:0022610 | biological adhesion                                      | 8.63E-06 | 1.10E-04    | 5.46E-12                              | 7.66E-10    |
| GO:0030154 | cell differentiation                                     | 9.85E-06 | 1.20E-04    | 1.06E-04                              | 1.14E-03    |
| GO:0048646 | anatomical structure formation involved in morphogenesis | 1.24E-05 | 1.44E-04    | 1.24E-03                              | 8.96E-03    |
| GO:0048468 | cell development                                         | 1.28E-05 | 1.44E-04    | 1.17E-04                              | 1.22E-03    |
| GO:0006928 | movement of cell or subcellular component                | 3.49E-05 | 3.77E-04    | 3.04E-03                              | 1.74E-02    |
| GO:0048513 | animal organ development                                 | 4.93E-05 | 4.77E-04    | 6.97E-04                              | 5.76E-03    |
| GO:0045595 | regulation of cell differentiation                       | 5.50E-05 | 5.15E-04    | 1.95E-03                              | 1.17E-02    |
| GO:0051094 | positive regulation of developmental process             | 6.97E-05 | 6.32E-04    | 2.02E-05                              | 2.99E-04    |
| GO:0065008 | regulation of biological quality                         | 9.70E-05 | 8.26E-04    | 1.21E-06                              | 2.83E-05    |
| GO:0023051 | regulation of signaling                                  | 1.66E-04 | 1.30E-03    | 1.53E-03                              | 1.03E-02    |

**b**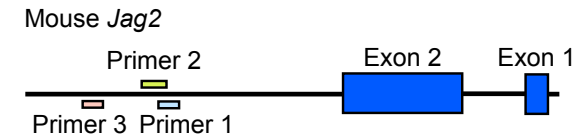**c**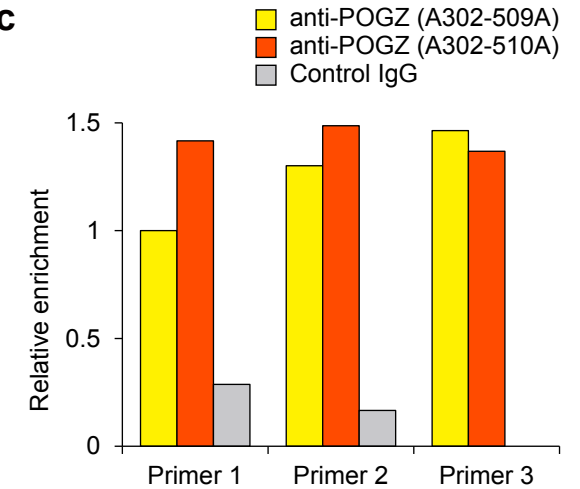

Supplementary Fig. 13 | **GO Annotation analysis and ChIP assay in NSCs.** **a.** Common gene ontology (GO) annotations (molecular function) for the differentially expressed genes between NSCs derived from the unaffected healthy control and the patient carrying the Q1042R mutation of *POGZ*, and E16.5 embryonic cortex of WT and *POGZ*<sup>WT/Q1038R</sup> mice by the ToppGene Suite (<https://toppgene.cchmc.org/>). **b.** Schematic diagram of qPCR amplicons of the primers for the mouse *Jag2* (NC\_000078.6) promoter. **c.** ChIP-qPCR assay for the quantification of relative enrichment of the genomic region in the mouse *Jag2* promoter.

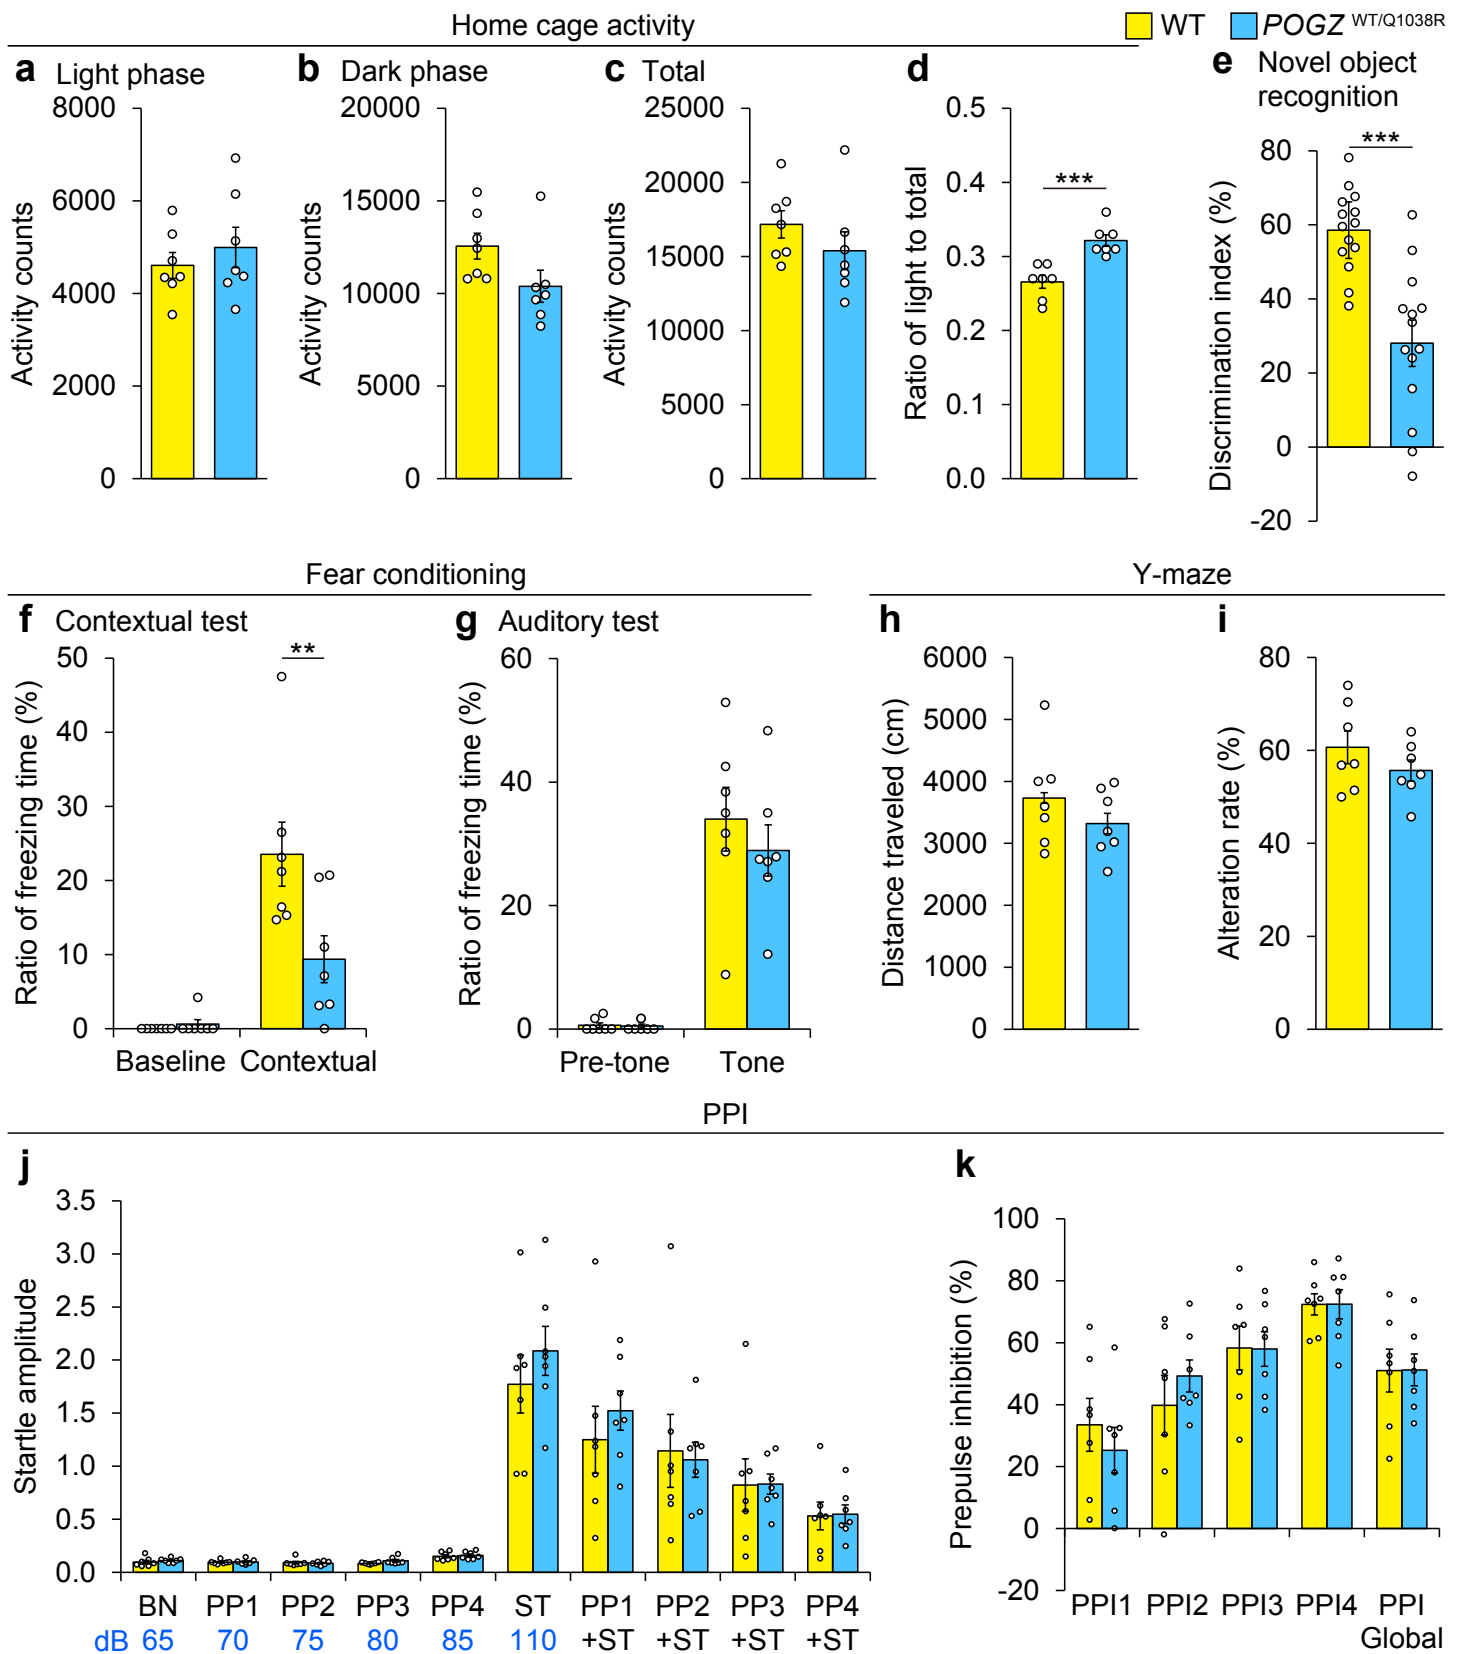

Supplementary Fig. 14 | **Behavioral abnormalities of heterozygous *POGZ*<sup>WT/Q1038R</sup> mice.** **a-d**, Home-cage activity of WT and *POGZ*<sup>WT/Q1038R</sup> mice (each n = 7). **e**, Impaired novel object recognition in *POGZ*<sup>WT/Q1038R</sup> mice (each n = 14). **f**, Impaired contextual fear memory in *POGZ*<sup>WT/Q1038R</sup> mice (each n = 7). **g**, Normal auditory fear memory in *POGZ*<sup>WT/Q1038R</sup> mice (each n = 7). **h, i**, Normal locomotion (**h**) and alteration ratio (**i**) in *POGZ*<sup>WT/Q1038R</sup> mice in the Y-maze test (each n = 7). **j, k**, Normal PPI in *POGZ*<sup>WT/Q1038R</sup> mice (each n = 7). WT, wild-type; PPI, prepulse inhibition; BN, background noise. **a-e, h, i**, One-way ANOVA with Bonferroni-Dunn *post hoc* tests; **a**,  $F_{1,12} = 0.558$ ; **b**,  $F_{1,12} = 3.821$ ; **c**,  $F_{1,12} = 1.282$ ; **d**,  $F_{1,12} = 23.05$ ; **e**,  $F_{1,26} = 24.76$ ; **h**,  $F_{1,12} = 1.272$ ; **i**,  $F_{1,12} = 1.428$ . **f, g, k**, Two-way ANOVA with Bonferroni-Dunn *post hoc* tests; **f**,  $F_{1,24} = 7.482$ ; **g**,  $F_{1,24} = 0.558$ ; **k**,  $F_{4,60} = 0.448$ . \*\* $P < 0.01$ , \*\*\* $P < 0.001$ . Data are presented as the mean  $\pm$  s.e.m.



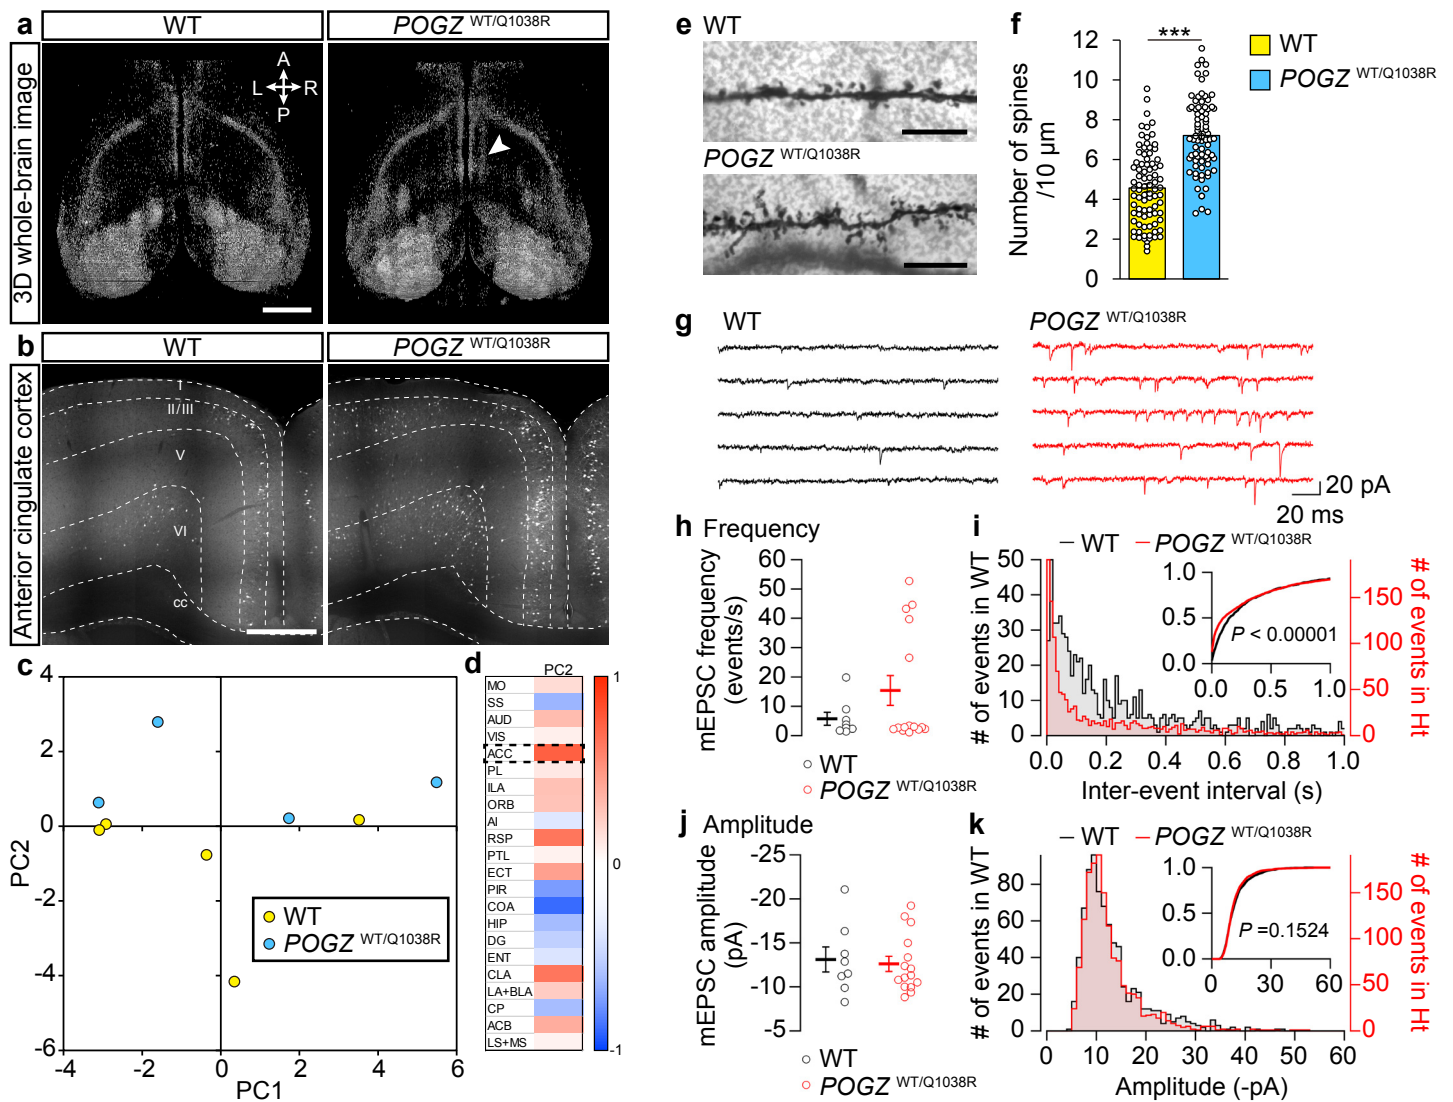

Supplementary Fig. 15 | **Increased cortical neuronal activity in *POGZ*<sup>WT/Q1038R</sup> mice.** **a**, Representative brain regions showing social-interaction-induced activation of Arc-dVenus fluorescence in adult WT and *POGZ*<sup>WT/Q1038R</sup> mice. Scale bar, 2 mm. **b**, Representative images of social-interaction-induced activation of Arc-dVenus fluorescence in the anterior cingulate cortex in adult WT and *POGZ*<sup>WT/Q1038R</sup> mice. Scale bar, 500 μm. **c**, Locations of individual WT and *POGZ*<sup>WT/Q1038R</sup> mice projected in principal component (PC) space defined by the first two PCs (in arbitrary PC units). **d**, Loadings for PC2 (in arbitrary PC weight units). Note the especially large contribution of the anterior cingulate cortex (ACC) to PC2 (dashed box). MO, motor cortex; SS, somatosensory cortex; AUD, auditory cortex; VIS, visual cortex; PL, prelimbic cortex; ILA, infralimbic cortex; ORB, orbitofrontal cortex; AI, agranular insular cortex; RSP, retrosplenial cortex; PTL, posterior parietal association cortex; ECT, entorhinal cortex; PIR, piriform cortex; COA, cortical amygdala; HIP, hippocampus excluding the dentate gyrus; DG, dentate gyrus; ENT, entorhinal cortex; CLA, claustrum; LA+BLA, lateral amygdala + basolateral amygdala; CP, caudoputamen; ACB, nucleus accumbens; LS+MS, lateral septum + medial septum. **e**, Golgi-staining showing increased spine density in the ACC in *POGZ*<sup>WT/Q1038R</sup> mice. Scale bars, 10 μm. **f**, Quantification of the spine density in the ACC (WT, n = 81 dendrites; *POGZ*<sup>WT/Q1038R</sup>, n = 80 dendrites). **g**, Representative traces of mEPSCs obtained from the ACC of adult WT and *POGZ*<sup>WT/Q1038R</sup> mice. **h, j**, Summary of mEPSC frequency (**h**) and amplitude (**j**) recorded in each neuron (WT, n = 8 neurons; *POGZ*<sup>WT/Q1038R</sup>, n = 15 neurons). Note that averaged mEPSC frequency in *POGZ*<sup>WT/Q1038R</sup> mice tended to be higher than that in WT mice. **i, k**, The distribution of the inter-event interval (**i**, WT, n = 792 events; *POGZ*<sup>WT/Q1038R</sup>, n = 1,485 events) and the amplitude (**k**, WT, n = 800 events; *POGZ*<sup>WT/Q1038R</sup>, n = 1,500 events) of mEPSCs. The cumulative probability plots described in the inset show a significant shift of the distribution of inter-event interval toward shorter intervals in *POGZ*<sup>WT/Q1038R</sup> mice. **f**, Student's *t*-test. **h, j**, Mann-Whitney *U* test. **i, k**, Kolmogorov-Smirnov test. \*\*\**P* < 0.001. Data are presented as the mean ± s.e.m.

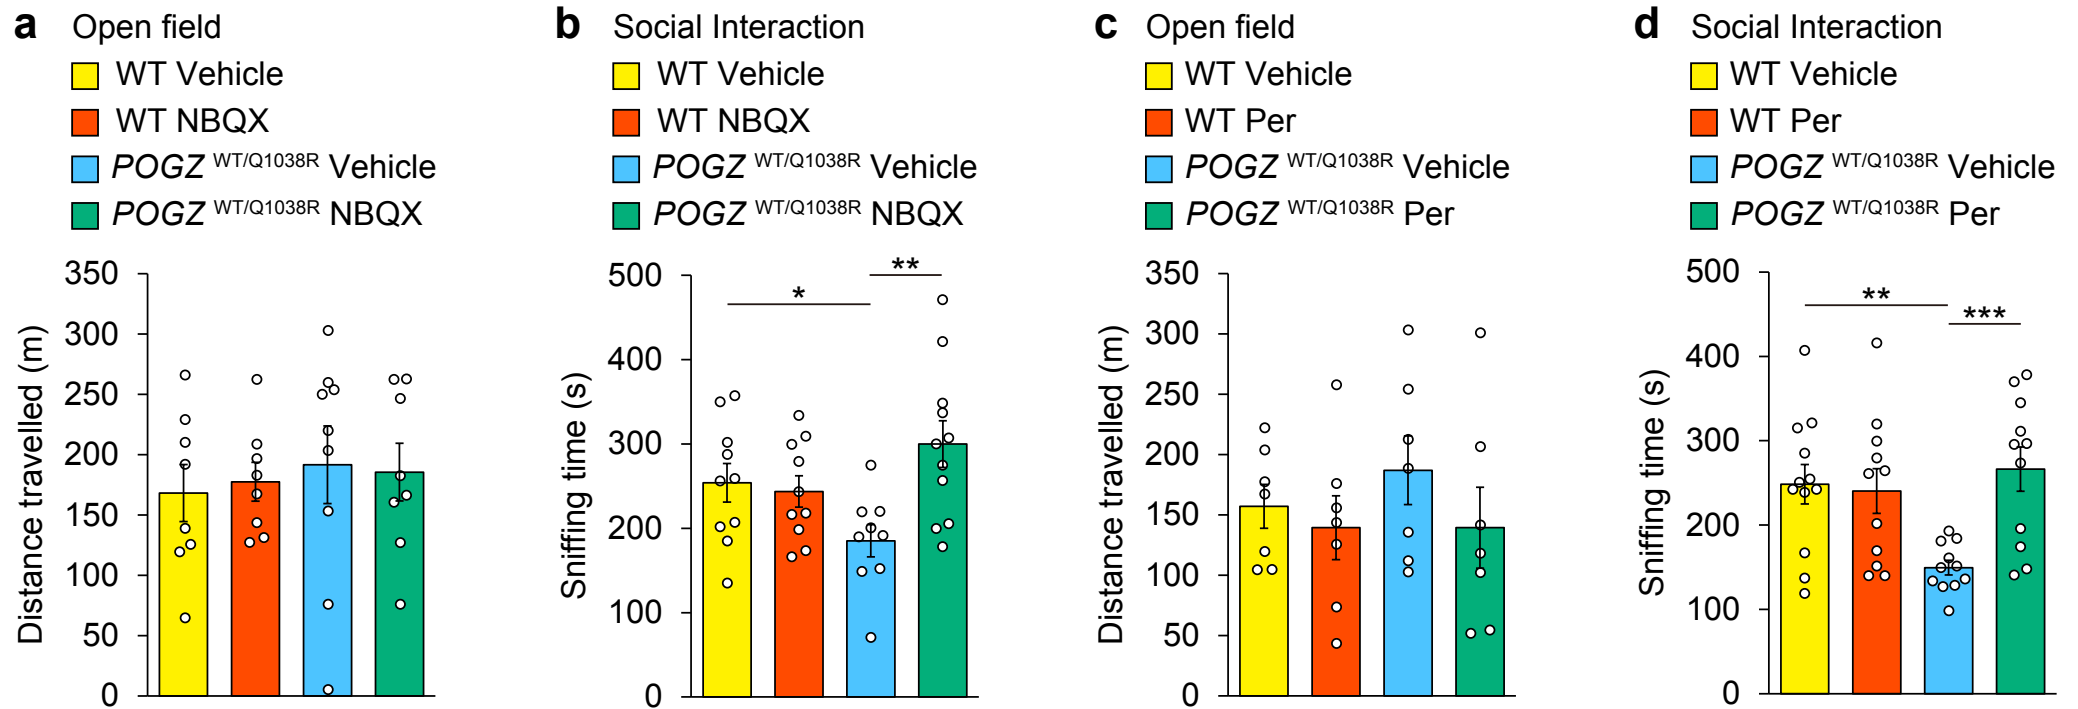

Supplementary Fig. 16 | **NBQX and perampanel treatment restore the impaired social interaction of  $POGZ^{WT/Q1038R}$  mice.** **a**, Distance travelled in the open-field test 30 min after NBQX treatment (10 mg per kg) (WT Vehicle, n = 8; WT NBQX, n = 8;  $POGZ^{WT/Q1038R}$  Vehicle, n = 9;  $POGZ^{WT/Q1038R}$  NBQX, n = 8). **b**, Time spent sniffing in the reciprocal social interaction test 30 min after NBQX treatment (10 mg per kg) (WT Vehicle, n = 10; WT NBQX, n = 10;  $POGZ^{WT/Q1038R}$  Vehicle, n = 9;  $POGZ^{WT/Q1038R}$  NBQX, n = 11). **c**, Distance travelled in the open-field test 30 min after perampanel treatment (3 mg per kg) (WT Vehicle, n = 7; WT perampanel, n = 7;  $POGZ^{WT/Q1038R}$  Vehicle, n = 7;  $POGZ^{WT/Q1038R}$  perampanel, n = 7). **d**, Perampanel treatment (3 mg per kg) restored the impaired social interaction of  $POGZ^{WT/Q1038R}$  mice (WT Vehicle, n = 12; WT perampanel, n = 11;  $POGZ^{WT/Q1038R}$  Vehicle, n = 11;  $POGZ^{WT/Q1038R}$  perampanel, n = 11). WT, wild-type; Per, perampanel. Two-way ANOVA followed by Bonferroni-Dunn *post hoc* tests; **a**,  $F_{1,29} = 0.09312$ ; **b**,  $F_{1,36} = 7.410$ ; **c**,  $F_{1,24} = 0.3024$ ; **d**,  $F_{1,41} = 7.658$ . \* $P < 0.05$ , \*\* $P < 0.01$ , \*\*\* $P < 0.001$ . Data are presented as the mean  $\pm$  s.e.m.

Supplementary Table 1 De novo mutations in POGZ

| Subject ID         | Position (GRCh37)   | Mutation (NM_015100.4) | Amino-acid change | Case              | Reference                                           |
|--------------------|---------------------|------------------------|-------------------|-------------------|-----------------------------------------------------|
| EE6                | 151402109           | c.538C>T               | Q180X             | ASD               | Stessman, H.A.F. et al., Am J Hum Genet., 2016      |
| 3                  | 151400625           | c.833C>G               | S278X             | ASD/ID            | White J. et al., Genome Med., 2016                  |
| 14483.p1           | 151400436           | c.941G>A               | S314N             | ASD               | lossifov I. et al., Nature, 2014                    |
| UMCN5              | 151397464           | c.1152dup              | R385Sfs*4         | ID                | Stessman, H.A.F. et al., Am J Hum Genet., 2016      |
| DDD4K.00380        | 151397434           | c.1181_1182insAT       | M394Ifs*76        | Unclassified NDDs | DDD Study, Nature, 2017*                            |
| EE5                | 151396736           | c.1212C>A              | Y404X             | ASD               | Stessman, H.A.F. et al., Am J Hum Genet., 2016      |
| -                  | 151396670_151396671 | c.1277_1278insC        | E427X             | ID                | Tan B. et al., J Hum Genet., 2016                   |
| 14551.p1           | 151384237           | c.1790A>G              | Y597C             | ASD               | lossifov I. et al., Nature, 2014                    |
| FR5                | 151384217           | c.1810G>T              | E604X             | ID                | Stessman, H.A.F. et al., Am J Hum Genet., 2016      |
| 2-1402-003         | 151384104           | c.1923C>G              | H641Q             | ASD               | Yuen R. et al., Nat. Neurosci., 2017                |
| UMCN7              | 151381211           | c.2020delC             | R674Vfs*9         | ASD/ID            | Stessman, H.A.F. et al., Am J Hum Genet., 2016      |
| EE4                | 151381211           | c.2020delC             | R674Vfs*9         | ID                | Stessman, H.A.F. et al., Am J Hum Genet., 2016      |
| 1                  | 151381022_151381025 | c.2094_2097dupAACT     | V700Nfs*7         | Unclassified NDDs | Ye Y. et al., Cold Spring Harb Mol Case Stud., 2015 |
| EE3                | 151380920_151380922 | c.2197_2199delGTC      | V733del           | ID                | Stessman, H.A.F. et al., Am J Hum Genet., 2016      |
| UMCN4              | 151380688           | c.2263delG             | E755Sfs*36        | ID                | Stessman, H.A.F. et al., Am J Hum Genet., 2016      |
| EE8                | 151380660           | c.2291delC             | P764Lfs*27        | ASD               | Stessman, H.A.F. et al., Am J Hum Genet., 2016      |
| DDD4K.03076        | 151380641           | c.2310C>G              | Y770X             | Unclassified NDDs | DDD Study, Nature, 2017*                            |
| 1                  | 151380630_151380627 | c.2321_2324delCTCT     | S774Cfs*16        | ID                | White J. et al., Genome Med., 2016                  |
| EE10               | 151379747           | c.2396G>A              | S799N             | ASD               | Stessman, H.A.F. et al., Am J Hum Genet., 2016      |
| FR2                | 151379743           | c.2400dupC             | K801Qfs*7         | ID                | Stessman, H.A.F. et al., Am J Hum Genet., 2016      |
| 10C102646          | 151379469           | c.2459_2462dupGTAC     | F822Yfs*43        | ASD               | Neale B.M. et al., Nature, 2012                     |
| EE9P               | 151379431           | c.2501delT             | L834Wfs*20        | ID                | Stessman, H.A.F. et al., Am J Hum Genet., 2016      |
| 7                  | 151379418           | c.2514dupC             | S839Lfs*25        | Unclassified NDDs | Ye Y. et al., Cold Spring Harb Mol Case Stud., 2015 |
| FR4                | 151378937           | c.2574delT             | H858Qfs*13        | ASD/ID            | Stessman, H.A.F. et al., Am J Hum Genet., 2016      |
| UMCN1              | 151378921           | c.2590C>T              | R864X             | ID                | Stessman, H.A.F. et al., Am J Hum Genet., 2016      |
| DDD4K.02675        | 151378800           | c.2711T>A              | L904X             | Unclassified NDDs | DDD study, Nature, 2015*                            |
| 3                  | 151378761           | c.2750dupC             | P918Tfs*26        | Unclassified NDDs | Ye Y. et al., Cold Spring Harb Mol Case Stud., 2015 |
| 2                  | 151378748           | c.2763dupC             | T922Hfs*22        | ID                | White J. et al., Genome Med., 2016                  |
| 5                  | 151378731           | c.2780dupT             | L927Pfs*17        | ASD/ID            | White J. et al., Genome Med., 2016                  |
| -                  | 151378691           | c.2820insG             | N941Efs*3         | ASD/ID            | Dentici M.L. et al., Am J Med Genet A., 2017        |
| FR3                | 151378675           | c.2836delG             | D946Mfs*12        | ASD/ID            | Stessman, H.A.F. et al., Am J Hum Genet., 2016      |
| 4                  | 151378576           | c.2935C > T            | R979X             | ID                | White J. et al., Genome Med., 2016                  |
| FR6                | 151378510           | c.3001C>T              | R1001X            | ASD/ID            | Stessman, H.A.F. et al., Am J Hum Genet., 2016      |
| DDD4K.00566        | 151378510           | c.3001C>T              | R1001X            | Unclassified NDDs | DDD Study, Nature, 2017*                            |
| 13627.p1           | 151378489           | c.3022C>T              | R1008X            | ASD               | lossifov I. et al., Nature, 2014                    |
| 2                  | 151378480           | c.3031C > T            | Q1011X            | Unclassified NDDs | Ye Y. et al., Cold Spring Harb Mol Case Stud., 2015 |
| UMCN10             | 151378471           | c.3040C>T              | Q1014X            | ID                | Stessman, H.A.F. et al., Am J Hum Genet., 2016      |
| 4                  | 151378470           | c.3041delA             | Q1014Rfs*5        | Unclassified NDDs | Ye Y. et al., Cold Spring Harb Mol Case Stud., 2015 |
| -                  | 151378393           | c.3118G>A              | E1040K            | ASD               | Fukai R. et al., J Hum Genet., 2015                 |
| P1381              | 151378386           | c.3125A>G              | Q1042R            | ASD               | Hashimoto R. et al., J Hum Genet., 2016             |
| EE7                | 151378372           | c.3139G>T              | E1047X            | ASD               | Stessman, H.A.F. et al., Am J Hum Genet., 2016      |
| DDD4K.01196        | 151378156           | c.3354delC             | L1119Cfs*3        | Unclassified NDDs | DDD study, Nature, 2015*                            |
| UMCN3              | 151378055_151378054 | c.3456_3457delAG       | E1154Tfs*4        | ID                | Stessman, H.A.F. et al., Am J Hum Genet., 2016      |
| UMCN9              | 151378055_151378054 | c.3456_3457delAG       | E1154Tfs*4        | ID                | Stessman, H.A.F. et al., Am J Hum Genet., 2016      |
| 13398              | 151377904           | c.3600_3607dupTGATGACG | E1203Vfs*28       | ASD               | DDD Study, Nature, 2017*                            |
| DDD4K.03715        | 151377883           | c.3628A>C              | T1210P            | Unclassified NDDs | DDD Study, Nature, 2017*                            |
| UMCN8              | 151377664           | c.3847C>T              | Q1283X            | ID                | Stessman, H.A.F. et al., Am J Hum Genet., 2016      |
| 181481             | 151414613           | c. 68A>G               | D23G              | Control           | De Rubeis S. et al., Nature, 2014                   |
| 304150             | 151403194           | c. 407A>G              | N136S             | Control           | De Rubeis S. et al., Nature, 2014                   |
| 04C37021A          | 151402172           | c. 475A>G              | N159D             | Control           | De Rubeis S. et al., Nature, 2014                   |
| 373385             | 151400355           | c. 1022A>G             | N341S             | Control           | De Rubeis S. et al., Nature, 2014                   |
| 11999.s1           | 151397495           | c.1121G>A              | R374Q             | Control           | Sanders S. et al., Neuron, 2015                     |
| 339733             | 151397480           | c. 1136G>A             | R379Q             | Control           | De Rubeis S. et al., Nature, 2014                   |
| DDD_MAIN5354965    | 151396611           | c. 1377C>T             | P446L             | Control           | De Rubeis S. et al., Nature, 2014                   |
| 94124              | 151396443           | c. 1505G>A             | R502K             | Control           | De Rubeis S. et al., Nature, 2014                   |
| 185197             | 151396443           | c. 1505G>A             | R502K             | Control           | De Rubeis S. et al., Nature, 2014                   |
| 05C43449A          | 151384780           | c. 2086G>A             | V591I             | Control           | De Rubeis S. et al., Nature, 2014                   |
| 252240             | 151384132           | c. 1895A>G             | N632S             | Control           | De Rubeis S. et al., Nature, 2014                   |
| 328789             | 151384132           | c. 1895A>G             | N632S             | Control           | De Rubeis S. et al., Nature, 2014                   |
| 347306             | 151384132           | c. 1895A>G             | N632S             | Control           | De Rubeis S. et al., Nature, 2014                   |
| 572608             | 151384132           | c. 1895A>G             | N632S             | Control           | De Rubeis S. et al., Nature, 2014                   |
| 514341             | 151381211           | c. 2020C>T             | R674C             | Control           | De Rubeis S. et al., Nature, 2014                   |
| UK10K_GS5336859    | 151379753           | c. 2390G>A             | R797Q             | Control           | De Rubeis S. et al., Nature, 2014                   |
| 05C39335A          | 151379450           | c. 2482G>A             | D828N             | Control           | De Rubeis S. et al., Nature, 2014                   |
| 476929             | 151378497           | c. 3014G>A             | R1005H            | Control           | De Rubeis S. et al., Nature, 2014                   |
| UK10K_SKUSE5080294 | 151378497           | c. 3014G>A             | R1005H            | Control           | De Rubeis S. et al., Nature, 2014                   |
| DDD_MAIN5318548    | 151378358           | c. 3153C>G             | F1051L            | Control           | De Rubeis S. et al., Nature, 2014                   |
| 451927             | 151378260           | c. 3251A>G             | H1084R            | Control           | De Rubeis S. et al., Nature, 2014                   |
| 04C27862A          | 151378203           | c. 3308T>A             | L1103H            | Control           | De Rubeis S. et al., Nature, 2014                   |
| 200098             | 151377648           | c. 3863C>T             | A1288V            | Control           | De Rubeis S. et al., Nature, 2014                   |
| DDD_MAIN5247205    | 151377648           | c. 3863C>T             | A1288V            | Control           | De Rubeis S. et al., Nature, 2014                   |
| 373775             | 151377301           | c. 4210G>A             | D1404N            | Control           | De Rubeis S. et al., Nature, 2014                   |

\*DDD : Deciphering Developmental Disorders

**Supplementary Table 2 MISSION shRNA TRC1 vectors**

| shRNA   | TRC number     | Hairpin Sequence (5' flanking-Sense Strand-Loop-Antisense Strand-3' flanking) |
|---------|----------------|-------------------------------------------------------------------------------|
| shPOGZ1 | TRCN0000098925 | CCGG-CCTGTGAATTTGTGGGTTATT-CTCGAG-AATAACCCACAAATTCACAGG-TTTTTG                |
| shPOGZ2 | TRCN0000098926 | CCGG-GCCAACAACAATGCTGGTAAT-CTCGAG-ATTACCAGCATTGTTGTTGGC-TTTTTG                |
| shPOGZ3 | TRCN0000098927 | CCGG-CCATGAAGATACTCGGCATTT-CTCGAG-AAATGCCGAGTATCTTCATGG-TTTTTG                |
| shPOGZ4 | TRCN0000098929 | CCGG-GCCAAACAGTTAGACCAATTA-CTCGAG-TAATTGGTCTAACTGTTTGGC-TTTTTG                |

**Supplementary Table 3 miR30-based shRNA vector**

| shRNA <sup>miR30</sup>  | Hairpin Sequence (5' flanking-Sense Strand-Loop-Antisense Strand-3' flanking)                       |
|-------------------------|-----------------------------------------------------------------------------------------------------|
| shPOGZ <sup>miR30</sup> | TGCTGTTGACAGTGAGCG-AGGCCGAATCTTCAGTGAAAG-TAGTGAAGCCACAGATGTA-CTTTCAGTGAAGATTCGGGCC-TGCCTACTGCCTCGGA |



**Supplementary Table 4 | RNA-sequencing in NSCs derived from the ASD patient carrying the Q1042R mutation of POGZ and the unaffected healthy control.** Fragments per kilobase of exon per million mapped fragments (FPKM) of each transcript and fold change between the patient-derived NSCs and control NSCs. Commonly differentially expressed genes annotated to "neurogenesis (GO: 0022008)" between human and mice (78 out of 913 genes annotated to GO: 0022008) are listed.

| Symbol  | Description                                                            | EntrezGene ID | Control NSC | Patient NSC | Control NSC<br>vs<br>Patient NSC |
|---------|------------------------------------------------------------------------|---------------|-------------|-------------|----------------------------------|
|         |                                                                        |               | FPKM        | FPKM        | Fold Change                      |
| CTHRC1  | collagen triple helix repeat containing 1                              | 115908        | 0.010       | 0.320       | 32.000                           |
| NKX6-2  | NK6 homeobox 2                                                         | 84504         | 0.060       | 1.440       | 24.000                           |
| S1PR5   | sphingosine-1-phosphate receptor 5                                     | 53637         | 0.010       | 0.100       | 10.000                           |
| GSX2    | GS homeobox 2                                                          | 170825        | 0.420       | 3.030       | 7.214                            |
| DSCAML1 | Down syndrome cell adhesion molecule like 1                            | 57453         | 0.010       | 0.060       | 6.000                            |
| ISL2    | insulin related protein 2 (islet 2)                                    | 64843         | 0.030       | 0.120       | 4.000                            |
| FGF8    | fibroblast growth factor 8                                             | 2253          | 0.140       | 0.490       | 3.500                            |
| GABRR2  | gamma-aminobutyric acid (GABA) C receptor, subunit rho 2               | 2570          | 0.050       | 0.160       | 3.200                            |
| PRKCH   | protein kinase C, eta                                                  | 5583          | 0.010       | 0.030       | 3.000                            |
| PLP1    | proteolipid protein (myelin) 1                                         | 5354          | 17.860      | 44.320      | 2.482                            |
| SCN1B   | sodium channel, voltage-gated, type I, beta                            | 6324          | 0.120       | 0.280       | 2.333                            |
| CLCF1   | cardiotrophin-like cytokine factor 1                                   | 23529         | 0.700       | 1.630       | 2.329                            |
| EGR2    | early growth response 2                                                | 1959          | 0.370       | 0.840       | 2.270                            |
| VAX2    | ventral anterior homeobox containing gene 2                            | 25806         | 6.240       | 13.540      | 2.170                            |
| TLR2    | toll-like receptor 2                                                   | 7097          | 0.150       | 0.310       | 2.067                            |
| EPOR    | erythropoietin receptor                                                | 2057          | 0.650       | 1.330       | 2.046                            |
| GSX1    | GS homeobox 1                                                          | 219409        | 10.170      | 20.580      | 2.024                            |
| TSHR    | thyroid stimulating hormone receptor                                   | 7253          | 0.050       | 0.100       | 2.000                            |
| POSTN   | periostin, osteoblast specific factor                                  | 10631         | 0.010       | 0.020       | 2.000                            |
| GFAP    | glial fibrillary acidic protein                                        | 2670          | 0.010       | 0.020       | 2.000                            |
| DSCAM   | Down syndrome cell adhesion molecule like 1                            | 1826          | 0.010       | 0.020       | 2.000                            |
| JAG2    | jagged 2                                                               | 3714          | 0.660       | 1.300       | 1.970                            |
| NPTXR   | neuronal pentraxin receptor                                            | 23467         | 1.960       | 3.810       | 1.944                            |
| DTX1    | deltex 1 homolog (Drosophila)                                          | 1840          | 1.320       | 2.540       | 1.924                            |
| CHRD1   | chordin-like 1                                                         | 91851         | 17.760      | 33.910      | 1.909                            |
| ADORA2A | adenosine A2a receptor                                                 | 135           | 0.950       | 1.800       | 1.895                            |
| CRTAC1  | cartilage acidic protein 1                                             | 55118         | 0.780       | 1.370       | 1.756                            |
| SLITRK3 | SLIT and NTRK-like family, member 3                                    | 22865         | 0.170       | 0.290       | 1.706                            |
| SLC8A3  | solute carrier family 8 (sodium/calcium exchanger), member 3           | 6547          | 0.780       | 0.460       | 1.696                            |
| CDH11   | cadherin 11                                                            | 1009          | 4.090       | 6.910       | 1.689                            |
| PAK3    | p21 protein (Cdc42/Rac)-activated kinase 3                             | 5063          | 4.580       | 7.680       | 1.677                            |
| CDHR1   | cadherin-related family member 1                                       | 92211         | 2.530       | 4.190       | 1.656                            |
| FLRT1   | fibronectin leucine rich transmembrane protein 1                       | 23769         | 0.170       | 0.280       | 1.647                            |
| ISLR2   | immunoglobulin superfamily containing leucine-rich repeat 2            | 57611         | 0.270       | 0.430       | 1.593                            |
| BDNF    | brain-derived neurotrophic factor                                      | 627           | 0.090       | 0.140       | 1.556                            |
| AMIGO3  | adhesion molecule with Ig like domain 3                                | 386724        | 3.800       | 5.870       | 1.545                            |
| FAS     | Fas (TNF receptor superfamily member 6)                                | 355           | 0.790       | 1.180       | 1.494                            |
| RTN4R   | reticulon 4 receptor                                                   | 65078         | 12.600      | 18.810      | 1.493                            |
| ATXN1   | ataxin 1                                                               | 6310          | 0.240       | 0.350       | 1.458                            |
| MMP24   | matrix metalloproteinase 24                                            | 10893         | 0.770       | 1.120       | 1.455                            |
| NPY     | neuropeptide Y                                                         | 4852          | 1.790       | 2.590       | 1.447                            |
| DCX     | doublecortin                                                           | 1641          | 31.780      | 42.640      | 1.342                            |
| MDK     | midkine                                                                | 4192          | 619.510     | 829.900     | 1.340                            |
| GPRIN1  | G protein-regulated inducer of neurite outgrowth 1                     | 114787        | 15.840      | 21.110      | 1.333                            |
| TEAD3   | TEA domain family member 3                                             | 7005          | 12.650      | 16.840      | 1.331                            |
| NTNG2   | netrin G2                                                              | 84628         | 3.940       | 5.230       | 1.327                            |
| CAV1    | caveolin 1, caveolae protein                                           | 857           | 0.370       | 0.490       | 1.324                            |
| TTBK1   | tau tubulin kinase 1                                                   | 84630         | 1.800       | 2.360       | 1.311                            |
| GPR173  | G-protein coupled receptor 173                                         | 54328         | 12.300      | 15.860      | 1.289                            |
| RARB    | retinoic acid receptor, beta                                           | 5915          | 7.440       | 9.060       | 1.218                            |
| CYB5D2  | cytochrome b5 domain containing 2                                      | 124936        | 11.390      | 13.810      | 1.212                            |
| STMN2   | stathmin-like 2                                                        | 11075         | 98.920      | 118.870     | 1.202                            |
| CEP290  | centrosomal protein 290                                                | 80184         | 6.060       | 4.800       | -1.263                           |
| LAMA2   | laminin, alpha 2                                                       | 3908          | 0.500       | 0.390       | -1.282                           |
| RND1    | Rho family GTPase 1                                                    | 27289         | 6.920       | 5.200       | -1.331                           |
| CHRN2   | cholinergic receptor, nicotinic, beta polypeptide 2 (neuronal)         | 1141          | 3.480       | 2.590       | -1.344                           |
| NEXN    | nexilin                                                                | 91624         | 2.560       | 1.900       | -1.347                           |
| ABLIM1  | actin-binding LIM protein 1                                            | 3983          | 10.150      | 7.110       | -1.428                           |
| SCARF1  | scavenger receptor class F, member 1                                   | 8578          | 0.400       | 0.280       | -1.429                           |
| SRRM4   | serine/arginine repetitive matrix 4                                    | 84530         | 9.270       | 6.430       | -1.442                           |
| GHRL    | ghrelin                                                                | 51738         | 0.060       | 0.040       | -1.500                           |
| PDGFB   | platelet derived growth factor, B polypeptide                          | 5155          | 0.060       | 0.040       | -1.500                           |
| WNT7B   | wingless-related MMTV integration site 7B                              | 7477          | 6.120       | 3.740       | -1.636                           |
| ERBB4   | v-erb-a erythroblastic leukemia viral oncogene homolog 4 (avian)       | 2066          | 3.170       | 1.930       | -1.642                           |
| DLX2    | distal-less homeobox 2                                                 | 1746          | 0.120       | 0.070       | -1.714                           |
| KDR     | kinase insert domain protein receptor                                  | 3791          | 0.120       | 0.070       | -1.714                           |
| ITGA3   | integrin alpha 3                                                       | 3675          | 0.390       | 0.220       | -1.773                           |
| ATP8A2  | ATPase, aminophospholipid transporter-like, class I, type 8A, member 2 | 51761         | 0.670       | 0.350       | -1.914                           |
| COBL    | cordón-bleu                                                            | 23242         | 0.150       | 0.070       | -2.143                           |
| P2RY2   | purinergic receptor P2Y, G-protein coupled 2                           | 5029          | 0.150       | 0.070       | -2.143                           |
| GRID2   | glutamate receptor, ionotropic, delta 2                                | 2895          | 1.430       | 0.660       | -2.167                           |
| NEUROD1 | neurogenic differentiation 1                                           | 4760          | 2.100       | 0.750       | -2.800                           |
| SHH     | sonic hedgehog                                                         | 6469          | 0.030       | 0.010       | -3.000                           |
| NCMAP   | noncompact myelin associated protein                                   | 400746        | 0.030       | 0.010       | -3.000                           |
| RGS6    | regulator of G-protein signaling 6                                     | 9628          | 0.630       | 0.150       | -4.200                           |
| MMP14   | matrix metalloproteinase 14 (membrane-inserted)                        | 4323          | 1.850       | 0.420       | -4.405                           |
| LPAR3   | lysophosphatidic acid receptor 3                                       | 23566         | 0.930       | 0.100       | -9.300                           |
| BCL11A  | B cell CLL/lymphoma 11A (zinc finger protein)                          | 53335         | 0.660       | 0.010       | -66.000                          |

**Supplementary Table 5 | RNA-sequencing in NSCs derived from the E16.5 embryonic cerebral cortex of *POGZ*<sup>WT/Q1038R</sup> Mice and WT Mice.** FPKM of each transcript and fold change between the NSCs derived from *POGZ*<sup>WT/Q1038R</sup> embryos and WT embryos. Commonly differentially expressed genes annotated to "neurogenesis (GO:0022008)" between human and mice (78 out of 251 genes annotated to GO: 0022008) are listed.

| Symbol  | Description                                                            | EntrezGene ID | NSC (WT mice) |        | NSC ( <i>POGZ</i> <sup>WT/Q1038R</sup> mice) |             | NSC (WT mice)<br>vs<br>NSC ( <i>POGZ</i> <sup>WT/Q1038R</sup> mice) |  |
|---------|------------------------------------------------------------------------|---------------|---------------|--------|----------------------------------------------|-------------|---------------------------------------------------------------------|--|
|         |                                                                        |               | FPKM          | FPKM   | FPKM                                         | Fold Change |                                                                     |  |
| Islr2   | immunoglobulin superfamily containing leucine-rich repeat 2            | 320563        | 0.122         | 0.447  | 3.665                                        |             |                                                                     |  |
| Npy     | neuropeptide Y                                                         | 109648        | 0.222         | 0.751  | 3.383                                        |             |                                                                     |  |
| Fgf8    | fibroblast growth factor 8                                             | 14179         | 0.094         | 0.237  | 2.373                                        |             |                                                                     |  |
| Rtn4r   | reticulon 4 receptor                                                   | 65079         | 0.314         | 0.683  | 2.175                                        |             |                                                                     |  |
| Jag2    | jagged 2                                                               | 16450         | 0.272         | 0.592  | 2.175                                        |             |                                                                     |  |
| Tlr2    | toll-like receptor 2                                                   | 24088         | 0.085         | 0.215  | 2.149                                        |             |                                                                     |  |
| Stmn2   | stathmin-like 2                                                        | 20257         | 0.397         | 0.783  | 1.973                                        |             |                                                                     |  |
| Isl2    | insulin related protein 2 (islet 2)                                    | 104360        | 0.136         | 0.269  | 1.973                                        |             |                                                                     |  |
| Clcf1   | cardiotrophin-like cytokine factor 1                                   | 56708         | 0.858         | 1.658  | 1.933                                        |             |                                                                     |  |
| Nptxr   | neuronal pentraxin receptor                                            | 73340         | 2.164         | 4.046  | 1.870                                        |             |                                                                     |  |
| Mmp24   | matrix metalloproteinase 24                                            | 17391         | 0.364         | 0.655  | 1.801                                        |             |                                                                     |  |
| Ntng2   | netrin G2                                                              | 171171        | 1.070         | 1.870  | 1.748                                        |             |                                                                     |  |
| Gpr173  | G-protein coupled receptor 173                                         | 70771         | 1.666         | 2.902  | 1.742                                        |             |                                                                     |  |
| Atxn1   | ataxin 1                                                               | 20238         | 0.168         | 0.290  | 1.728                                        |             |                                                                     |  |
| Crtac1  | cartilage acidic protein 1                                             | 72832         | 0.807         | 1.391  | 1.724                                        |             |                                                                     |  |
| Fas     | Fas (TNF receptor superfamily member 6)                                | 14102         | 2.573         | 4.303  | 1.672                                        |             |                                                                     |  |
| Prkch   | protein kinase C, eta                                                  | 18755         | 0.073         | 0.164  | 1.635                                        |             |                                                                     |  |
| Nkx6-2  | NK6 homeobox 2                                                         | 14912         | 0.681         | 1.094  | 1.607                                        |             |                                                                     |  |
| Slitrk3 | SLIT and NTRK-like family, member 3                                    | 386750        | 1.103         | 1.740  | 1.578                                        |             |                                                                     |  |
| Postn   | periostin, osteoblast specific factor                                  | 50706         | 0.179         | 0.281  | 1.571                                        |             |                                                                     |  |
| Gsx1    | GS homeobox 1                                                          | 14842         | 1.911         | 2.991  | 1.565                                        |             |                                                                     |  |
| Scn1b   | sodium channel, voltage-gated, type I, beta                            | 20266         | 6.633         | 9.915  | 1.495                                        |             |                                                                     |  |
| Cthrc1  | collagen triple helix repeat containing 1                              | 68588         | 0.625         | 0.926  | 1.480                                        |             |                                                                     |  |
| Tshr    | thyroid stimulating hormone receptor                                   | 22095         | 0.127         | 0.185  | 1.450                                        |             |                                                                     |  |
| Ttbk1   | tau tubulin kinase 1                                                   | 106763        | 1.915         | 2.762  | 1.442                                        |             |                                                                     |  |
| Cdh11   | cadherin 11                                                            | 12552         | 2.200         | 3.107  | 1.412                                        |             |                                                                     |  |
| Vax2    | ventral anterior homeobox containing gene 2                            | 24113         | 0.219         | 0.308  | 1.410                                        |             |                                                                     |  |
| Gabbr2  | gamma-aminobutyric acid (GABA) C receptor, subunit rho 2               | 14409         | 0.139         | 0.196  | 1.410                                        |             |                                                                     |  |
| S1pr5   | sphingosine-1-phosphate receptor 5                                     | 94226         | 0.033         | 0.138  | 1.382                                        |             |                                                                     |  |
| Mdk     | midkine                                                                | 17242         | 2.688         | 3.679  | 1.369                                        |             |                                                                     |  |
| Rarb    | retinoic acid receptor, beta                                           | 218772        | 0.961         | 1.306  | 1.358                                        |             |                                                                     |  |
| Slc8a3  | solute carrier family 8 (sodium/calcium exchanger), member 3           | 110893        | 2.257         | 3.030  | 1.343                                        |             |                                                                     |  |
| Dcx     | doublecortin                                                           | 13193         | 0.346         | 0.462  | 1.335                                        |             |                                                                     |  |
| Adora2a | adenosine A2a receptor                                                 | 11540         | 0.289         | 0.380  | 1.316                                        |             |                                                                     |  |
| Plp1    | proteolipid protein (myelin) 1                                         | 18823         | 0.928         | 1.218  | 1.312                                        |             |                                                                     |  |
| Cav1    | caveolin 1, caveolae protein                                           | 12389         | 4.490         | 5.842  | 1.301                                        |             |                                                                     |  |
| Gfap    | glial fibrillary acidic protein                                        | 14580         | 0.000         | 0.129  | 1.291                                        |             |                                                                     |  |
| Chrd1   | chordin-like 1                                                         | 83453         | 12.893        | 16.430 | 1.274                                        |             |                                                                     |  |
| Dtx1    | deltex 1 homolog (Drosophila)                                          | 14357         | 6.862         | 8.723  | 1.271                                        |             |                                                                     |  |
| Gsx2    | GS homeobox 2                                                          | 14843         | 0.821         | 1.041  | 1.269                                        |             |                                                                     |  |
| Cyb5d2  | cytochrome b5 domain containing 2                                      | 192986        | 2.965         | 3.761  | 1.269                                        |             |                                                                     |  |
| Pak3    | p21 protein (Cdc42/Rac)-activated kinase 3                             | 18481         | 1.948         | 2.461  | 1.263                                        |             |                                                                     |  |
| Amigo3  | adhesion molecule with Ig like domain 3                                | 320844        | 1.376         | 1.705  | 1.239                                        |             |                                                                     |  |
| Cdhr1   | cadherin-related family member 1                                       | 170677        | 2.317         | 2.870  | 1.239                                        |             |                                                                     |  |
| Bdnf    | brain derived neurotrophic factor                                      | 12064         | 0.511         | 0.632  | 1.236                                        |             |                                                                     |  |
| Egr2    | early growth response 2                                                | 13654         | 3.334         | 4.104  | 1.231                                        |             |                                                                     |  |
| Dscam1  | Down syndrome cell adhesion molecule like 1                            | 114873        | 0.369         | 0.454  | 1.230                                        |             |                                                                     |  |
| Flrt1   | fibronectin leucine rich transmembrane protein 1                       | 396184        | 0.357         | 0.436  | 1.222                                        |             |                                                                     |  |
| Gprin1  | G protein-regulated inducer of neurite outgrowth 1                     | 26913         | 6.309         | 7.682  | 1.218                                        |             |                                                                     |  |
| Tead3   | TEA domain family member 3                                             | 21678         | 3.678         | 4.475  | 1.217                                        |             |                                                                     |  |
| Epor    | erythropoietin receptor                                                | 13857         | 0.323         | 0.390  | 1.208                                        |             |                                                                     |  |
| Dscam   | Down syndrome cell adhesion molecule                                   | 13508         | 6.720         | 8.091  | 1.204                                        |             |                                                                     |  |
| Ablim1  | actin-binding LIM protein 1                                            | 226251        | 1.212         | 1.010  | -1.200                                       |             |                                                                     |  |
| Srm4    | serine/arginine repetitive matrix 4                                    | 68955         | 0.720         | 0.600  | -1.201                                       |             |                                                                     |  |
| Wnt7b   | wingless-related MMTV integration site 7B                              | 22422         | 12.637        | 10.472 | -1.207                                       |             |                                                                     |  |
| Cep290  | centrosomal protein 290                                                | 216274        | 2.456         | 1.937  | -1.268                                       |             |                                                                     |  |
| Itga3   | integrin alpha 3                                                       | 16400         | 0.225         | 0.177  | -1.273                                       |             |                                                                     |  |
| Chrb2   | cholinergic receptor, nicotinic, beta polypeptide 2 (neuronal)         | 11444         | 0.534         | 0.415  | -1.287                                       |             |                                                                     |  |
| Bcl11a  | B cell CLL/lymphoma 11A (zinc finger protein)                          | 14025         | 2.028         | 1.575  | -1.287                                       |             |                                                                     |  |
| Dlx2    | distal-less homeobox 2                                                 | 13392         | 2.970         | 2.288  | -1.298                                       |             |                                                                     |  |
| Neurod1 | neurogenic differentiation 1                                           | 18012         | 0.360         | 0.277  | -1.301                                       |             |                                                                     |  |
| Mmp14   | matrix metalloproteinase 14 (membrane-inserted)                        | 17387         | 47.957        | 36.645 | -1.309                                       |             |                                                                     |  |
| Nexn    | nexilin                                                                | 68810         | 10.214        | 7.700  | -1.327                                       |             |                                                                     |  |
| Rnd1    | Rho family GTPase 1                                                    | 223881        | 2.547         | 1.901  | -1.340                                       |             |                                                                     |  |
| Pdgfrb  | platelet derived growth factor, B polypeptide                          | 18591         | 1.449         | 1.064  | -1.362                                       |             |                                                                     |  |
| Shh     | sonic hedgehog                                                         | 20423         | 0.213         | 0.154  | -1.379                                       |             |                                                                     |  |
| Scarf1  | scavenger receptor class F, member 1                                   | 380713        | 0.140         | 0.024  | -1.396                                       |             |                                                                     |  |
| Kdr     | kinase insert domain protein receptor                                  | 16542         | 0.371         | 0.265  | -1.397                                       |             |                                                                     |  |
| Grid2   | glutamate receptor, ionotropic, delta 2                                | 14804         | 0.159         | 0.112  | -1.419                                       |             |                                                                     |  |
| Cobl    | cordon-bleu                                                            | 12808         | 0.152         | 0.105  | -1.445                                       |             |                                                                     |  |
| P2ry2   | purinergic receptor P2Y, G-protein coupled 2                           | 18442         | 0.428         | 0.294  | -1.455                                       |             |                                                                     |  |
| Lama2   | laminin, alpha 2                                                       | 16773         | 0.543         | 0.372  | -1.457                                       |             |                                                                     |  |
| ErbB4   | v-erb-a erythroblastic leukemia viral oncogene homolog 4 (avian)       | 13869         | 0.849         | 0.562  | -1.511                                       |             |                                                                     |  |
| Ncmamp  | noncompact myelin associated protein                                   | 230822        | 0.241         | 0.153  | -1.576                                       |             |                                                                     |  |
| Lpar3   | lysophosphatidic acid receptor 3                                       | 65086         | 0.163         | 0.028  | -1.635                                       |             |                                                                     |  |
| Atp8a2  | ATPase, aminophospholipid transporter-like, class I, type 8A, member 2 | 50769         | 0.172         | 0.091  | -1.720                                       |             |                                                                     |  |
| Rgs6    | regulator of G-protein signaling 6                                     | 50779         | 0.216         | 0.078  | -2.164                                       |             |                                                                     |  |
| Ghrl    | ghrelin                                                                | 58991         | 0.703         | 0.198  | -3.547                                       |             |                                                                     |  |
